# 1 SARS-CoV-2 drives NLRP3 inflammasome activation in human 2 microglia through spike-ACE2 receptor interaction

3 Eduardo Albornoz<sup>1\*</sup>, Alberto A Amarilla<sup>2\*</sup>, Naphak Modhiran<sup>2,3</sup>, Sandra Parker<sup>1</sup>, Xaria X. Li<sup>1</sup>,  
4 Danushka K. Wijesundara<sup>2,3</sup>, Adriana Pliego Zamora<sup>2</sup>, Christopher LD McMillan<sup>2</sup>, Benjamin  
5 Liang<sup>2</sup>, Nias Y.G. Peng<sup>2</sup>, Julian D.J. Sng<sup>2</sup>, Fatema Tuj Saima<sup>1</sup>, Devina Paramitha<sup>1</sup>, Rhys  
6 Parry<sup>2</sup>, Michael S. Avumegah<sup>2,3</sup>, Ariel Isaacs<sup>2</sup>, Martin Lo<sup>1</sup>, Zaray Miranda-Chacon<sup>4,5</sup>, Daniella  
7 Bradshaw<sup>1</sup>, Constanza Salinas-Rebolledo<sup>4</sup>, Niwanthi W. Rajapakse<sup>1</sup>, Trent Munro<sup>2,3</sup>,  
8 Alejandro Rojas-Fernandez<sup>4</sup>, Paul R. Young<sup>2,3,6</sup>, Katryn J Stacey<sup>2</sup>, Alexander A. Khromykh<sup>2,6</sup>,  
9 Keith J. Chappell<sup>2,3,6</sup>, Daniel Watterson<sup>2#</sup> and Trent M. Woodruff<sup>1,7#</sup>

10  
11 <sup>1</sup>School of Biomedical Sciences, Faculty of Medicine, University of Queensland, St Lucia,  
12 Queensland 4072, Australia.

<sup>2</sup>School of Chemistry and Molecular Biosciences, University of Queensland, St Lucia, QLD,  
Australia 4072.

<sup>3</sup>The Australian Institute for Biotechnology and Nanotechnology, The University of  
Queensland, St Lucia, QLD 4072, Australia.

13 <sup>4</sup>Institute of Medicine, Faculty of Medicine, Universidad Austral de Chile, Valdivia, Chile

14 <sup>5</sup>Molecular Medicine Laboratory, Medical School, Universidad de Costa Rica

15 <sup>6</sup>Australian Infectious Disease Research Centre, Global Virus Network Centre of Excellence  
16 Brisbane, 4072 and 4029, Australia

17 <sup>7</sup>Queensland Brain Institute, University of Queensland, St Lucia, Queensland 4072, Australia.

18  
19 \*These authors contributed equally and should be considered as joint first authors

# These authors contributed equally and should be considered as joint corresponding authors.

## 20 # Correspondence:

21 Corresponding Authors

22 [t.woodruff@uq.edu.au](mailto:t.woodruff@uq.edu.au) or [d.watterson@uq.edu.au](mailto:d.watterson@uq.edu.au)

23  
24 Keywords: SARS-CoV-2, NLRP3, Microglia,  $\alpha$ -synuclein, Spike  
25  
26  
27  
28  
29  
30  
31  
32  
33  
34  
35  
36  
37  
38

39 **ABSTRACT**

40 Coronavirus disease-2019 (COVID-19) is primarily a respiratory disease, however, an  
41 increasing number of reports indicate that SARS-CoV-2 infection can also cause severe  
42 neurological manifestations, including precipitating cases of probable Parkinson's disease. As  
43 microglial NLRP3 inflammasome activation is a major driver of neurodegeneration, here we  
44 interrogated whether SARS-CoV-2 can promote microglial NLRP3 inflammasome activation  
45 utilising a model of human monocyte-derived microglia. We identified that SARS-CoV-2  
46 isolates can bind and enter microglia, triggering inflammasome activation in the absence of  
47 viral replication. Mechanistically, microglial NLRP3 could be both primed and activated with  
48 SARS-CoV-2 spike glycoprotein in a NF- $\kappa$ B and ACE2-dependent manner. Notably, virus-  
49 and spike protein-mediated inflammasome activation in microglia was significantly enhanced  
50 in the presence of  $\alpha$ -synuclein fibrils, which was entirely ablated by NLRP3-inhibition. These  
51 results support a possible mechanism of microglia activation by SARS-CoV-2, which could  
52 explain the increased vulnerability to developing neurological symptoms akin to Parkinson's  
53 disease in certain COVID-19 infected individuals, and a potential therapeutic avenue for  
54 intervention.

55

56

57

58 **SIGNIFICANCE STATEMENT**

59 Severe acute respiratory syndrome coronavirus 2 (SARS-CoV-2) principally affects the lungs,  
60 however there is evidence that the virus can also reach the brain and lead to chronic  
61 neurological symptoms. In this study, we examined the interaction SARS-CoV-2 with brain  
62 immune cells, by using an ex-vivo model of human monocyte-derived microglia. We identified  
63 robust activation of the innate immune sensor complex, NLRP3 inflammasome, in cells  
64 exposed to SARS-CoV-2. This was dependent on spike protein-ACE2 receptor interaction and  
65 was potentiated in the presence of  $\alpha$ -synuclein. We therefore identify a possible mechanism for  
66 SARS-CoV-2 and increased vulnerability to developing neurological dysfunction. These  
67 findings support a potential therapeutic avenue for treatment of SARS-CoV-2 driven  
68 neurological manifestations, through use of NLRP3 inflammasome or ACE2 inhibitors.

69

## 70 INTRODUCTION

71 Neuroinflammation is a hallmark of neurodegenerative diseases. A variety of stimuli within  
72 the central nervous system (CNS), including pathogens, injury, toxic metabolites, and protein  
73 aggregates among others, can lead to the activation of the innate immune response mainly  
74 through microglial activation. When chronically activated, this defence mechanism creates a  
75 proinflammatory environment that drives neurodegeneration (1, 2). Microglia are resident  
76 populations of macrophages in the CNS that respond to pathogen-associated molecular patterns  
77 (PAMPs) and host- or environment-derived danger-associated molecular patterns (DAMPs) to  
78 drive innate immune responses and inflammation within the brain. Recent evidence has  
79 highlighted the role of intracellular protein complexes, known as the inflammasomes, in CNS  
80 innate immunity.

81 These complexes mediate the response to PAMPs and DAMPs, leading to the generation of  
82 IL-1 $\beta$ , IL-18 and ultimately cellular pyroptosis, which can aid in the elimination of invading  
83 pathogens, clearance of damaged cells, and promotion of tissue repair (3). The NLR family  
84 pyrin domain containing 3 (NLRP3) inflammasome is a key inflammasome expressed by  
85 microglia (4), and is activated by multiple protein aggregates associated with  
86 neurodegenerative disease including  $\alpha$ -synuclein in Parkinson's disease (PD), amyloid- $\beta$  in  
87 Alzheimer's disease (AD), and TDP43 and SOD1 aggregates in amyotrophic lateral sclerosis  
88 (ALS) (5-7). Microglial NLRP3 inflammasome can also be activated by a variety of pathogenic  
89 viruses with neurotropism such as Zika virus (ZIKV) and Japanese Encephalitis virus (JEV)  
90 (8, 9). The NLRP3 inflammasome is comprised of the NLRP3 protein, the adaptor molecule  
91 apoptosis-associated speck-like protein containing a CARD (ASC), and caspase-1. Activation  
92 of NLRP3 is a two-step process; a priming step usually mediated through a Toll-like receptor  
93 involves NF- $\kappa$ B-dependent induction of both NLRP3 and pro-IL-1 $\beta$ , whereas the triggering  
94 step leads to oligomerisation of NLRP3, recruitment of ASC, and recruitment and activation  
95 of caspase-1. Active caspase-1 then cleaves pro-IL-1 $\beta$  and pro-IL-18 into their active forms,  
96 and initiates pyroptotic cell death (10).

97 The hypothesis that viral infections can accelerate neurodegeneration is gaining attention with  
98 relevance to the current COVID-19 pandemic (11, 12). It has become clear that severe acute  
99 respiratory syndrome coronavirus 2 (SARS-CoV-2) can invade and affect multiple organs and  
100 tissues including the brain (13, 14). Post-mortem analysis of brains obtained from deceased

101 SARS-CoV-2 patients showed extensive microglial activation with pronounced  
102 neuroinflammation in the brainstem (15, 16).

103 Moreover, accumulating evidence shows that acute and sub-acute neurological complications  
104 of SARS-CoV-2 infections are reported in up to 85% of patients not only with severe COVID-  
105 19, but also in mildly symptomatic or asymptomatic patients (17, 18). These manifestations  
106 include headache, dizziness, impaired consciousness, encephalopathy, delirium, confusion,  
107 seizure, gait difficulties, cerebrovascular events, and post-infectious autoimmunity (19).  
108 Peripheral disorders include Guillain-Barre-syndrome, myositis-like muscle injury, and  
109 notably, up to 65% of COVID-19 affected patients reported decreased sense of smell or  
110 hyposmia (18), which also is a common pre-motor symptom in PD (20). Additionally, reported  
111 cases of PD linked to COVID-19 (21-23), have triggered attention to evaluating SARS-CoV-2  
112 infections and their impact on PD (24, 25). However, the specific mechanism of how SARS-  
113 CoV-2 could increase the risk of developing neurological manifestations, and potentially PD,  
114 and how this infection could possibly impact synucleinopathy has not been demonstrated.

115 Here, we used a human monocyte-derived microglia (MDMi) cellular model to assess NLRP3  
116 inflammasome activation in response to SARS-CoV-2, and its spike protein, and the  
117 consequences of this exposure in the presence of  $\alpha$ -synuclein protein aggregate fibrils. We  
118 determined that SARS-CoV-2 isolates, as well as spike protein alone, can both prime and  
119 activate the NLRP3 inflammasome in human microglia through NF- $\kappa$ B and ACE2. Microglia  
120 exposed to SARS-CoV-2, or its spike protein also potentiated  $\alpha$ -synuclein mediated NLRP3  
121 activation, indicating a possible mechanism for COVID-19 and increased vulnerability to  
122 developing movement disorders in certain infected individuals.

123

## 124 **RESULTS**

### 125 **SARS-CoV-2 can enter human monocyte-derived microglia (MDMi) without supporting** 126 **replication**

127 To investigate the possible role of SARS-CoV-2 in promoting inflammasome activation in the  
128 brain, we first generated MDMi following an established protocol to obtain adult microglia  
129 (26). Initially, we verified that our generated MDMi highly expressed the typical microglia  
130 signature markers – P2RY12 and TMEM119 compared to monocyte derived macrophages  
131 (MDM) (Figure 1A-B). Next, we assessed whether these MDMi can support SARS-CoV-2

132 replication by monitoring infectious virus particle release after infection with multiplicity of  
133 infection (MOI) of 1 and 0.1 To achieve this, we used an early clinical isolate of SARS-CoV-  
134 2, referred to here as D614 (27). Notably, we found no secreted virus in the supernatant of  
135 infected MDMi and mouse primary microglia (mMi) cell culture supernatants, which  
136 contrasted to that in Vero E6 and Caco2 cells (Figure 1C), supporting the notion that microglia  
137 cells do not support SARS-CoV-2 replication *in vitro*.

138 As angiotensin-converting enzyme 2 (ACE2) is the most well-characterized receptor for  
139 SARS-CoV-2 cell attachment (28), and is expressed in the CNS, predominantly by glia,  
140 neurons and neurovascular endothelium (29), we proceeded to determine the level of ACE2 in  
141 MDMi by qPCR and western blot. We observed that MDMi expressed ACE2 mRNA, although  
142 the levels were lower compared to Vero E6 and Caco2 cells (Figure 1D). Western blot analysis  
143 from lysed microglia showed that ACE2 protein levels varied greatly in individual donors and  
144 displayed a differential pattern of expression compared to Vero E6 and Caco2 cells (Figure  
145 1E). The control cells (VeroE6 and Caco2) showed an expected full-length size of the  
146 glycosylated ACE2 form of approximately 120 KDa, while microglia cells showed molecular  
147 weights of ~135 and ~100 kDa. Notably, similar patterns have been also found in endothelial  
148 cells and heart tissue from COVID-19 patients (30, 31).

149 Given that MDMi expressed ACE2 receptor, yet did not support virus replication, we sought  
150 to determine whether SARS-CoV-2 binds to the microglial cell surface. To address this, MDMi  
151 were exposed to D614 at MOI of 1, incubated for 2 hours at 4°C and then subjected to several  
152 washes to remove all unbound particles. We found significant levels of viral RNA from bound  
153 virus particle on the cell surface (Figure 1F), suggesting that SARS-CoV-2 can indeed bind to  
154 MDMi. We next investigated whether virus binding could promote viral entry by using a  
155 pseudo-virus entry assay as previously reported for SARS-CoV-2 (32, 33). MDMi were  
156 transduced with SARS-CoV-2 pseudo-virus for 72 hours and titer was determined by luciferase  
157 activity. We observed higher levels of intracellular luciferase activity in microglia cells  
158 infected with the pseudo-virus compared to the non-glycoprotein control (NE) and this level  
159 was comparable to pseudo-virus transduced VeroE6 cells (Figure 1G), suggesting that SARS-  
160 CoV-2 has the ability to enter human microglia cells.

161 To further investigate whether SARS-CoV-2 productively replicates in MDMi, we utilised a  
162 recently characterised SARS-CoV-2 reporter virus bearing ZsGreen fluorescent protein (34),  
163 and infected cells using a MOI of 1 and monitored up to 3 days post infection (dpi). As  
164 expected, we detected a high level of ZsGreen fluorescent protein expression in Vero E6 cells

165 (Figure 1H and supplementary Figure 1). Furthermore, no intracellular ZsGreen fluorescence  
 166 was observed in MDMi (Figure 1H and supplementary Figure 1), confirming the inability of  
 167 SARS-CoV-2 to establish replication in these cells.

168

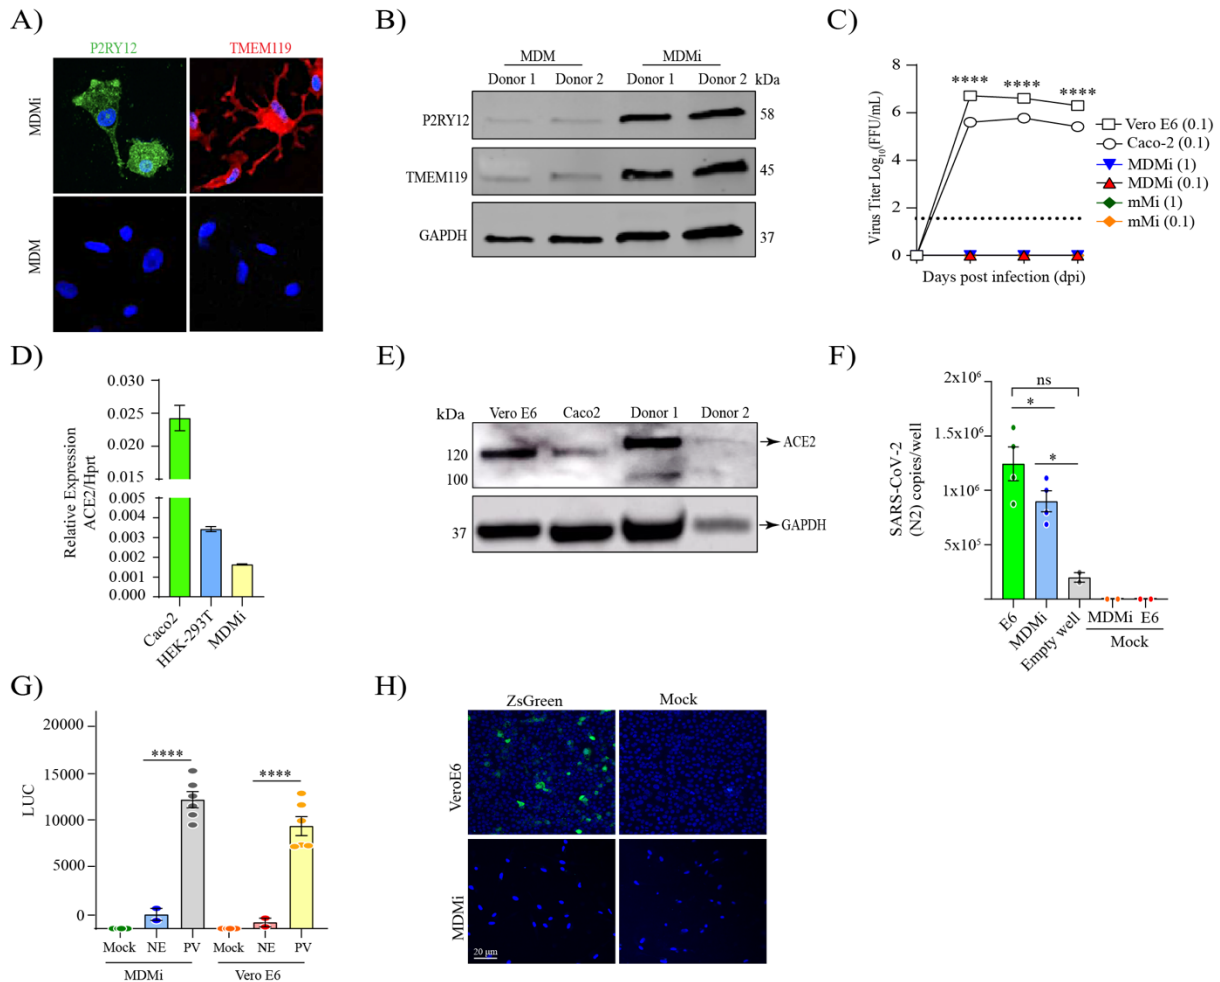

169

170

171 **Figure 1: SARS-CoV-2 isolates can enter human monocyte-derived microglia (MDMi) in**  
 172 **the absence of viral replication.** Microglia signature markers, P2RY12 and TMEM119 (in  
 173 green) and cells nuclei (in blue) assessed by immunofluorescence staining, and representative  
 174 western blot are presented in panel (A-B), respectively. Growth kinetics of SARS-CoV-2  
 175 (D614) on MDMi, mouse microglia (mMi), Vero E6 and Caco2 cells in (C). Relative  
 176 expression of ACE2 in MDMi by qPCR compared to Vero E6 and Hek-293T in (D). Level of  
 177 ACE2 receptor in MDMi and mouse microglia compared to Caco2 and Vero E6 cells analysed  
 178 by western blot shown in panel (E). Viral RNA levels from SARS-CoV-2 particles bound on  
 179 cell surface expressed as N2 copies/well in (F) Intracellular luciferase level (LUC) delivered  
 180 by pseudo-virus (PV) particle for SARS-CoV-2 in MDMi and Vero E6 compared to the non-  
 181 glycoprotein control (NE) in (G). SARS-CoV-2 replication on MDMi (at MOI of 1) and Vero  
 182 E6 (at MOI of 0.01) using SARS-CoV-2 reporter virus expressing ZsGreen fluorescent protein  
 183 assessed directly under confocal microscopy at 3dpi are shown in panel (H). Data points are  
 184 means  $\pm$  SEM from at least three different donors. \*P < 0.05, \*\*P < 0.01, and \*\*\*P < 0.001  
 185 and \*\*\*\*P < 0.0001 by two-way ANOVA test with Sidak's correction.



## 186 The inflammasome is activated in human microglia by SARS-CoV-2

187 Microglia are the resident immune cells found in the CNS that patrol the brain sensing for  
 188 pathogens or damage-associated stress signal (35). To investigate microglial inflammasome  
 189 activation in response to SARS-CoV-2, we exposed MDMi cells to SARS-CoV-2 and  
 190 measured key inflammasome activation signals. MDMi were incubated with MOI of 1 of D614  
 191 isolate directly, or in LPS-primed cells. At 24-hour post infection, western blot and  
 192 immunocytochemistry was performed to examine markers of inflammasome activation (Figure  
 193 2A-C).

194 We identified SARS-CoV-2 alone induced inflammasome activation in MDMi as measured by  
 195 the release of cleaved IL-1 $\beta$  in the supernatant of cells exposed to D614. This correlated with  
 196 increased levels of cleaved caspase-1, validating activation of the inflammasome (Figure 2A-  
 197 B). These results were corroborated by ASC speck formation, a cellular hallmark of  
 198 inflammasome activation. Increased ASC speck staining was observed in MDMi cells treated  
 199 with D614 (both primed and unprimed), and LPS-primed cells activated with nigericin (Nig)  
 200 as a positive control (Figure 2C). Notably, our finding that SARS-CoV-2 exposure can directly  
 201 activate the inflammasome in MDMi in the absence of priming, indicates that the virus can  
 202 both prime and activate the inflammasome.

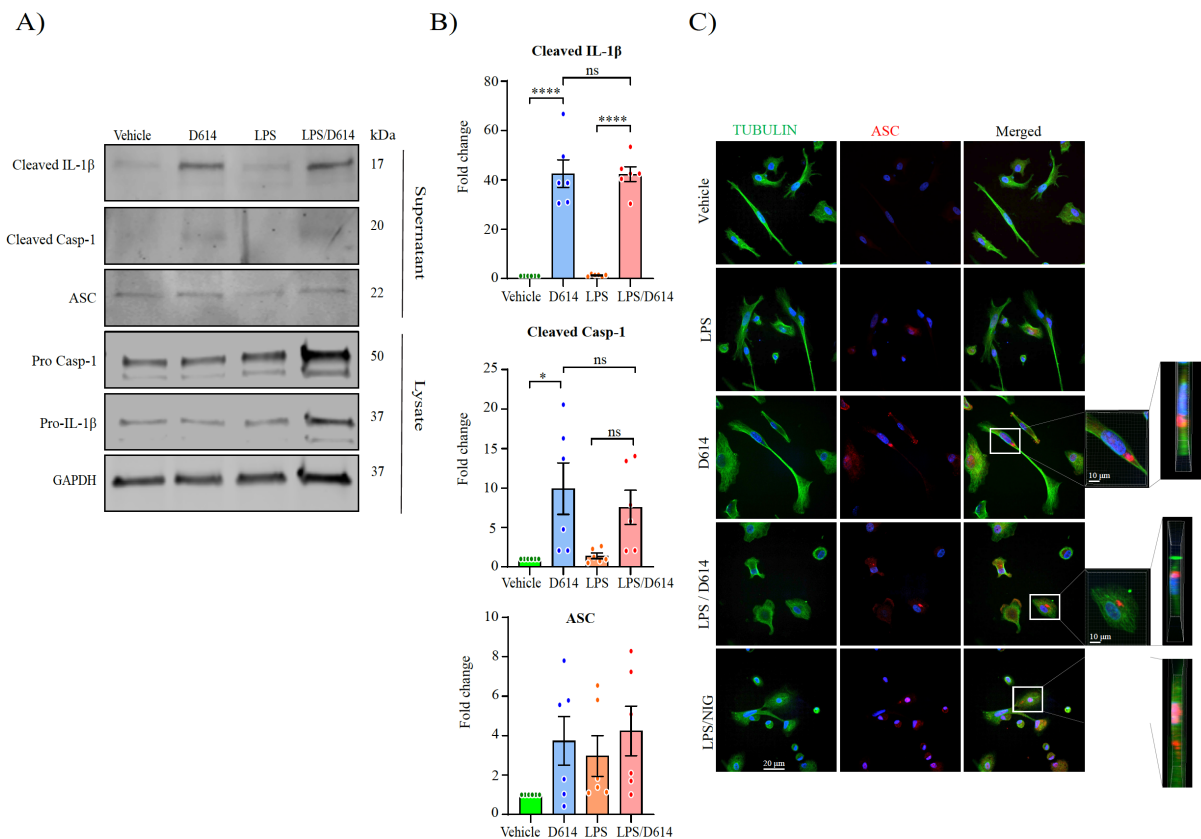

203

204 **Figure 2. SARS-CoV-2 activates the inflammasome in MDMi.** Western blot and  
205 densitometric analysis (fold change against vehicle group) for cleaved IL-1 $\beta$ , cleaved caspase-  
206 1 (p20), and ASC in the supernatants of LPS-primed or unprimed MDMi treated with SARS-  
207 CoV-2 (D614) isolate for 24 hours are presented in (A-B) respectively. Expression of GAPDH  
208 was determined in cell lysates. Immunofluorescence staining of primed or unprimed MDMi  
209 treated with SARS-CoV-2 (D614)–for Tubulin is stained in green and the formation of a  
210 characteristic inflammasome ASC speck (red) is shown in (C). LPS-Nigericin (Nig; 10 $\mu$ M, 1  
211 hour) was used as a positive control. Scale bar, 20  $\mu$ m. Inset magnified view of ASC specks.  
212 DAPI (blue), 4',6-diamidino-2-phenylindole). Data points are means  $\pm$  SEM from at least  
213 three different donors. \*P < 0.05, \*\*P < 0.01, and \*\*\*P < 0.001 and \*\*\*\* P < 0.0001 by one-  
214 way analysis of variance (ANOVA) with Tukey's post hoc test.

215

### 216 **SARS-CoV-2 spike protein activates the NLRP3 inflammasome in human microglia**

217 Given that MDMi cells express ACE2 and that live virus activated MDMi independent of viral  
218 replication, we next determined whether spike protein itself could trigger inflammasome  
219 activation directly in human microglia. We previously designed a prefusion-stabilized SARS-  
220 CoV-2 spike protein (S-clamp) that resembles a closed trimeric prefusion conformation (36).  
221 To further identify the mechanism of inflammasome activation by SARS-CoV-2, we first  
222 produced low endotoxin S-clamp and a control trimeric fusion protein (F-clamp) from Nipah  
223 virus and validated these proteins using SDS-PAGE, size exclusion chromatography and  
224 ELISA (Figure 3A-C). As expected, the monomeric molecular weight of the S-clamp and F-  
225 clamp monomers were 180 and 60 KDa, respectively (Figure 3A). Additionally, we also  
226 confirmed that the majority of the S-clamp and F-clamp were presented in their trimeric form  
227 using size-exclusion chromatography and maintained reactivity assessed by binding of key  
228 specific antibodies (Figure 3B and C). Next, we proceeded to expose LPS-primed MDMi with  
229 different concentrations of S-clamp or control F-clamp protein as shown in a schematic  
230 representation in Figure 3D and identified that spike protein (S-clamp), but not the control F-  
231 clamp, induced significantly increased levels of IL-1 $\beta$  in supernatants after 24 hours exposure  
232 (Figure 3E). This activation was entirely ablated in the presence of MCC950, a selective  
233 inhibitor of NLRP3, confirming that the spike protein of SARS-CoV-2 is able to activate the  
234 NLRP3 inflammasome in LPS-primed microglia (Figure 3E). We further confirmed spike-  
235 mediated inflammasome activation through western blotting, showing dose-dependent  
236 increases in cleaved IL-1 $\beta$  and cleaved caspase-1 in the supernatant, and NLRP3 in cell lysates  
237 (Figure 3F-G). Although NLRP3 and pro-IL-1 $\beta$  are induced by LPS, they had evidently  
238 decayed after the wash-out of LPS but been re-induced by the spike protein. This this suggests  
239 that spike protein is both priming and activating the inflammasome.



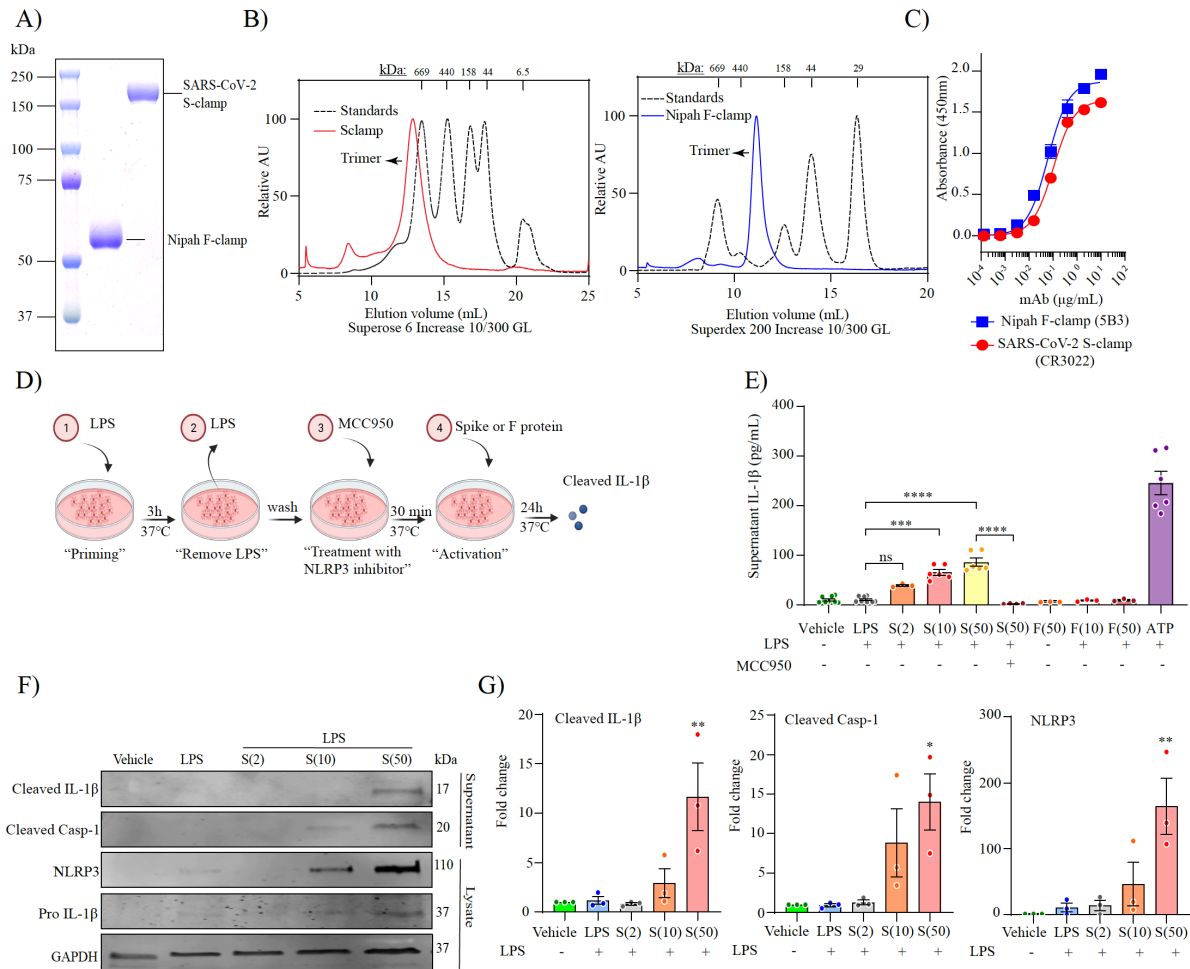

240

241

242 **Figure 3. SARS-CoV-2 spike protein activates the NLRP3 inflammasome in LPS-primed**  
 243 **MDMi.** Prefusion-stabilized SARS-CoV-2 spike protein (S-clamp) and Fusion protein of  
 244 Nipah virus (F-clamp) characterization by SDS-PAGE (A), size-exclusion high-performance  
 245 liquid chromatography (B) and ELISA with conformational specific monoclonal antibodies  
 246 (C). Schematic representation for spike activation on LPS primed-MDMi (D). Spike-mediated  
 247 microglial IL-1β secretion (supernatant) in vehicle (untreated) or LPS-primed MDMi exposed  
 248 to S-clamp (S; 2-50 μg) or F-clamp (F; 50 μg) in presence or absence of MCC950 (10 μM)  
 249 treatment is shown in panel (E). ATP (5 mM) treatment for 1 hour was used as a positive  
 250 control. Western blots (F) and densitometric analysis (fold change against vehicle group) (G)  
 251 for NLRP3 in cell lysates of S-clamp-activated MDMi. Data are means ± SEM from at least  
 252 three different donors. \*P < 0.05, \*\*P < 0.01, and \*\*\*P < 0.001 and \*\*\*\* P < 0.0001 by one-  
 253 way analysis of variance (ANOVA) with Tukey's post hoc test.

254

255

### 256 Spike protein activates NLRP3 inflammasome through ACE2 in human microglia

257 As spike protein is the major surface glycoprotein of the SARS-CoV-2 viral particle and  
 258 contains a receptor-binding domain (RBD) that recognises ACE2 (37), we hypothesized that  
 259 inflammasome activation is mediated by ACE2-RBD interaction. To address this, we first  
 260 produced a low endotoxin version of a soluble human ACE2 protein (hACE2-FcM) and

261 validated it in a neutralization assay. We found that the soluble human ACE2 protein blocked  
 262 SARS-CoV-2 entry into Vero E6 cells (Figure 4A) with 50% inhibitory concentration (IC<sub>50</sub>)  
 263 of 39 µg/mL, compared to control protein (hNCAM-FcM) produced similar manner as hACE2-  
 264 FcM (Figure 4A). Based on this finding, we complexed the soluble ACE2 protein with the S-  
 265 clamp at a molar ratio of 5:1, respectively, incubated at 37°C for 1 hour, and then used this  
 266 complex to treat MDMi. We found a complete inhibition of IL-1β secretion in culture  
 267 supernatants compared to S-clamp treatment alone (Figure 4B). Additionally, pre-treatment of  
 268 MDMi with the ACE2 inhibitor, MLN-4760, also significantly reduced spike protein induced  
 269 IL-1β release from LPS-primed MDMi (Figure 4C). Furthermore, to confirm that MDMi  
 270 activation is ACE2 dependent, we used a well characterised monoclonal antibody (3E8),  
 271 against human ACE2 (38). To test the effect of 3E8 in blocking cell activation by spike protein,  
 272 we first produced a low endotoxin level of 3E8 and a control antibody CO5 (anti HA of  
 273 influenza A), followed by validation with SDS-PAGE and ELISA (Figure 4D-E). Pre-  
 274 treatment of LPS-primed MDMi with 3E8 specifically inhibited IL-1β secretion after activation  
 275 with S-clamp compared to CO5 and nigericin (Figure 4F), suggesting that spike-ACE2  
 276 interaction specifically contributes to inflammasome activation in microglia.  
 277

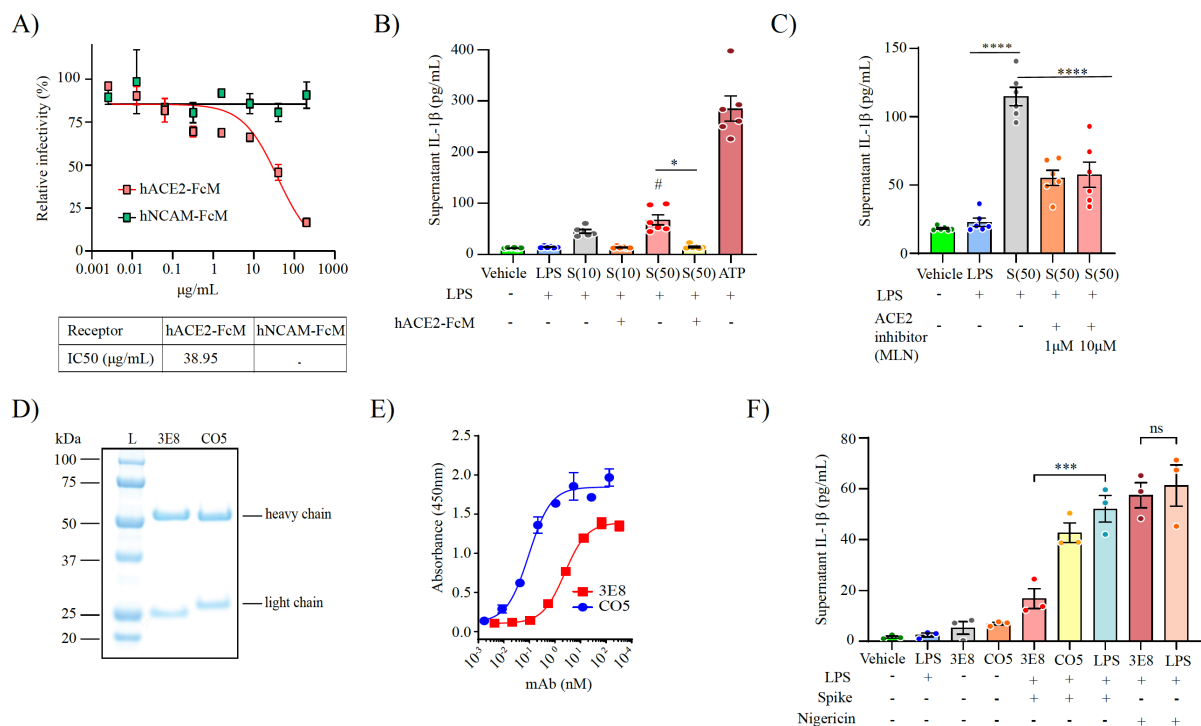

278

279 **Figure 4. SARS-CoV-2 spike protein activates the NLRP3 inflammasome through ACE2**  
 280 **in MDMi.** Relative of infectivity determined by Plaque Reduction Neutralisation Test (PRNT)  
 281 to verify the neutralizing level of a soluble receptor hACE2-FcM compared to a non-related

282 SARS-CoV-2 receptor NCAM-FcM (top) and the inhibitory concentration (IC<sub>50</sub>) (bottom)  
283 (A). Spike-mediated IL-1 $\beta$  secretion (supernatant) in vehicle (untreated) or LPS-primed  
284 MDMi exposed to S-clamp (S; 10-50  $\mu$ g) in presence or absence of the soluble hACE2-FcM  
285 protein. ATP (5 mM) treatment for 1 hour was used as a positive control (B). Inhibition of  
286 spike-mediated IL-1 $\beta$  secretion by ACE2 inhibition with MLN-4760 (1 or 10  $\mu$ M) (C).  
287 Validation of low endotoxin anti-ACE2 (3E8) and anti-Hemagglutinin from influenza A H3  
288 (CO5) proteins by SDS-PAGE and ELISA (D-E). Effect of 3E8 in blocking cells activation by  
289 spike protein in pre-treatment of LPS-primed MDMi exposed to S-clamp (F). Data are means  
290  $\pm$  SEM from at least three different donors. \*P < 0.05, \*\*P < 0.01, and \*\*\*P < 0.001 and \*\*\*\*  
291 P < 0.0001 by one-way analysis of variance (ANOVA) with Tukey's post hoc test.

292  
293

### 294 **SARS-CoV-2 spike protein primes the NLRP3 inflammasome through NF- $\kappa$ B.**

295 We next evaluated if spike protein can also prime MDMi. To achieve this, MDMi were first  
296 stimulated with S-clamp for 6 hours, then media containing S-clamp was removed and replaced  
297 with fresh media and incubated with either ATP or nigericin for 1 hour as the inflammasome-  
298 activating signal, as shown in a schematic representation in Figure 5A. We observed a  
299 significant IL-1 $\beta$  release for both activators in S-clamp-primed cells, in comparison with either  
300 vehicle, S-clamp, ATP or nigericin alone, and the level was of a similar, but slightly reduced  
301 magnitude to LPS-primed cells (Figure 5B-C). We also confirmed an S-clamp priming effect  
302 through immunocytochemistry, showing ASC speck formation in S-clamp-primed cells  
303 activated with nigericin (Figure 5D), displaying a similar morphology to cells previously  
304 primed with LPS and activated with nigericin used as a positive control (Figure 2C).

305 To test if NF- $\kappa$ B signalling pathway is required for inflammasome priming by spike protein,  
306 we pre-treated MDMi with the NF- $\kappa$ B inhibitor, Bay 11-7082, before stimulation with S-clamp  
307 and the addition of ATP or nigericin. We found a complete inhibition of IL-1 $\beta$  release (Figure  
308 5E), confirming S-clamp priming activity is mediated through the NF- $\kappa$ B pathway. Moreover,  
309 after priming with S-clamp, and before activating with either ATP or nigericin, we treated the  
310 cells with the NLRP3 inhibitor MCC950 and demonstrated a complete inhibition of IL-1 $\beta$   
311 secretion (Figure 5E), confirming as expected that nigericin and ATP triggered NLRP3 after  
312 priming by spike protein.

313 Recently, it has been shown that SARS-CoV-2 triggers pyroptosis in human monocytes (39).  
314 Therefore, we assayed whether S-clamp priming and nigericin inflammasome activation  
315 triggered pyroptosis in MDMi. Pyroptosis was quantified using lactate dehydrogenase (LDH)  
316 release, and the caspase-1 inhibitor VX-765 was used to selectively assess the role for  
317 inflammasome activation in cell death. We observed that nigericin treatment of S-clamp

318 primed MDMi readily triggered caspase-1-dependent pyroptosis within 1 hour (Figure 5F)  
 319 which was significantly reduced in the presence of caspase-1 inhibitor VX-765. SARS-CoV-2  
 320 spike protein mediating priming of the inflammasome has recently be documented in  
 321 macrophages derived from COVID-19 patients (40). Our data now provides strong evidence  
 322 that SARS-CoV-2 spike protein can also prime the NLRP3 inflammasome through the NF-kB  
 323 pathway in human microglia.

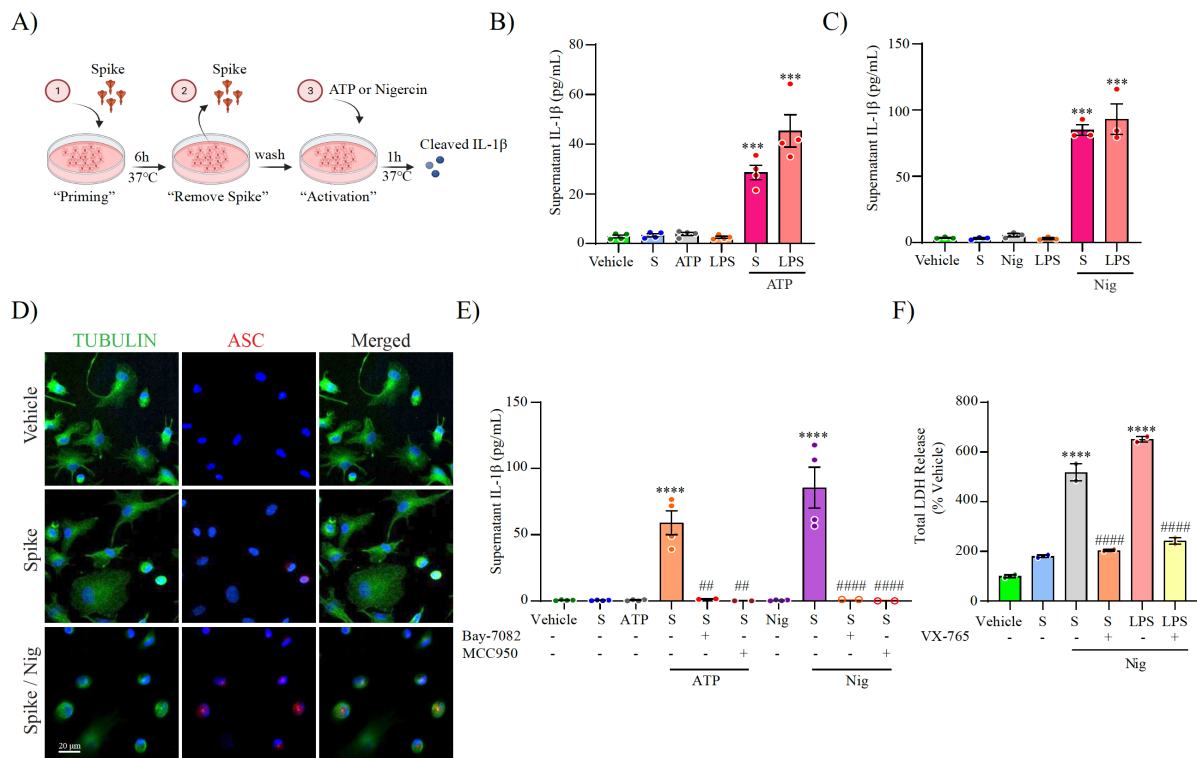

324

325 **Figure 5. SARS-CoV-2 spike protein primes the NLRP3 inflammasome through NF-kB.**  
 326 Schematic representation for spike priming experiments (6 hours) followed ATP or Nigericin  
 327 (Nig) activation (1 hour) (A). Level of secreted IL-1β in unprimed or S-clamp-primed MDMi  
 328 (S; 50μg 6 hours) followed activation with ATP (5mM, 1 hour) in panel (B) or Nigericin (Nig;  
 329 10μM, 1 hour) in panel (C). In both LPS-primed cells were used as a positive control (200  
 330 ng/ml 3 hours). Immunofluorescence staining of vehicle or S-clamp (S; 50μg 6 hours)–primed  
 331 MDMi, activated with Nigericin (Nig; 10μM, 1 hour) showing tubulin (green) and the  
 332 formation of a characteristic inflammasome ASC speck (red) are shown in (D). Scale bar, 20  
 333 μm. ATP and Nigericin–mediated IL-1β secretion (supernatant) in vehicle (untreated) or S-  
 334 clamp-primed MDMIs exposed to ATP (5mM, 1 hour) or Nigericin (Nig; 10μM, 1 hour) in  
 335 presence or absence of Bay 11-7082 (3 μM) or MCC950 (10 μM) are shown in (E). Lactate  
 336 dehydrogenase (LDH) release assay for quantification of caspase-1–dependent pyroptosis in  
 337 S-clamp (S; 50 μg 6 hours) primed cells activated with Nigericin (Nig; 10μM, 1 hour) in (F).  
 338 LPS-Nigericin and VX-765 (20 μM) were used as positive controls. Data are means ± SEM  
 339 from at least 3 independent donors. \*\*\*P < 0.001 and \*\*\*\* P < 0.0001 by one-way analysis  
 340 of variance (ANOVA) with Tukey’s post hoc test.

341 **SARS-CoV-2 promotes  $\alpha$ -synuclein mediated NLRP3 inflammasome activation by**  
342 **priming MDMi through spike protein.**

343 The underlying mechanism of microglial activation by SARS-CoV-2 and their impact in  
344 presence of endogenous neurodegenerative disease-driving triggers are unclear. To better  
345 understand the effect of SARS-CoV-2 infection on promoting human microglia activation in  
346 relation to brain disease triggers, MDMi were incubated with D614 (MOI 0.1 or 1) in the  
347 presence or absence of preformed fibrils of  $\alpha$ -synuclein for 24 hours as shown in a schematic  
348 representation in Figure 6A, and the level of cleaved IL-1 $\beta$ , cleaved caspase-1 and ASC in the  
349 supernatant were measured by western blot. We identified the presence of cleaved IL-1 $\beta$ ,  
350 cleaved caspase-1, and ASC in the supernatant of MDMi treated with SARS-CoV-2 and  $\alpha$ -  
351 synuclein, in the absence of LPS (Figure 6B). Notably, an increase of inflammasome activation  
352 was achieved with D614 (0.1 MOI) in presence of  $\alpha$ -synuclein, whereas neither D614 at MOI  
353 0.1, or  $\alpha$ -synuclein alone, were able to activate the inflammasome; however, when combined,  
354 they released significant cleaved IL-1 $\beta$ , and cleaved caspase-1 in the supernatant (Figure 6B,  
355 C). Immunocytochemistry for ASC further confirmed this observation, showing increased  
356 levels ASC speck formation in cells treated with D614 at MOI 0.1 in presence of  $\alpha$ -synuclein  
357 (Figure 6D).

358 To examine the role of SARS-CoV2 spike protein in the context of  $\alpha$ -synuclein microglial  
359 inflammasome activation, we repeated the experimental paradigm with spike in presence of  $\alpha$ -  
360 synuclein for 24 hours as shown in a schematic representation in Figure 6E. Performing  
361 western blot for cleaved IL-1 $\beta$ , cleaved caspase-1 and ASC on supernatants, we confirmed  
362 inflammasome activation with both spike and  $\alpha$ -synuclein in MDMi, and a trend towards an  
363 increase in cleaved IL-1 $\beta$  when  $\alpha$ -synuclein and spike were combined (Figure 6F-G). We next  
364 proceeded to evaluate whether spike protein could prime MDMi for enhanced inflammasome  
365 activation driven by  $\alpha$ -synuclein. We therefore primed MDMi with S-clamp for 6 hours  
366 followed by  $\alpha$ -synuclein activation for 24 hours (Figure 6H). We confirmed by ELISA that no  
367 significant IL-1 $\beta$  release was induced by either S-clamp priming or  $\alpha$ -synuclein when  
368 administered alone, however robust IL-1 $\beta$  release was found in S-clamp primed cells in the  
369 presence of  $\alpha$ -synuclein, at levels even greater than LPS-primed cells (Figure 6H). This result  
370 correlated with ASC speck formation in S-clamp primed cells activated with  $\alpha$ -synuclein  
371 (Figure 6I). To confirm the S-clamp priming effect in this context was also mediated through  
372 NF- $\kappa$ B signalling, we pre-treated cells with the NF- $\kappa$ B inhibitor Bay 11-7082 and demonstrated



373 a complete inhibition of cleaved IL-1 $\beta$  release (Figure 6J). Altogether, our data demonstrates  
 374 that SARS-CoV-2, and spike protein, can both prime and activate the NLRP3 inflammasome  
 375 in human microglia, also potentiating activation in the presence of  $\alpha$ -synuclein, supporting a  
 376 possible risk factor for COVID-19 in Parkinson's disease and neurodegeneration.

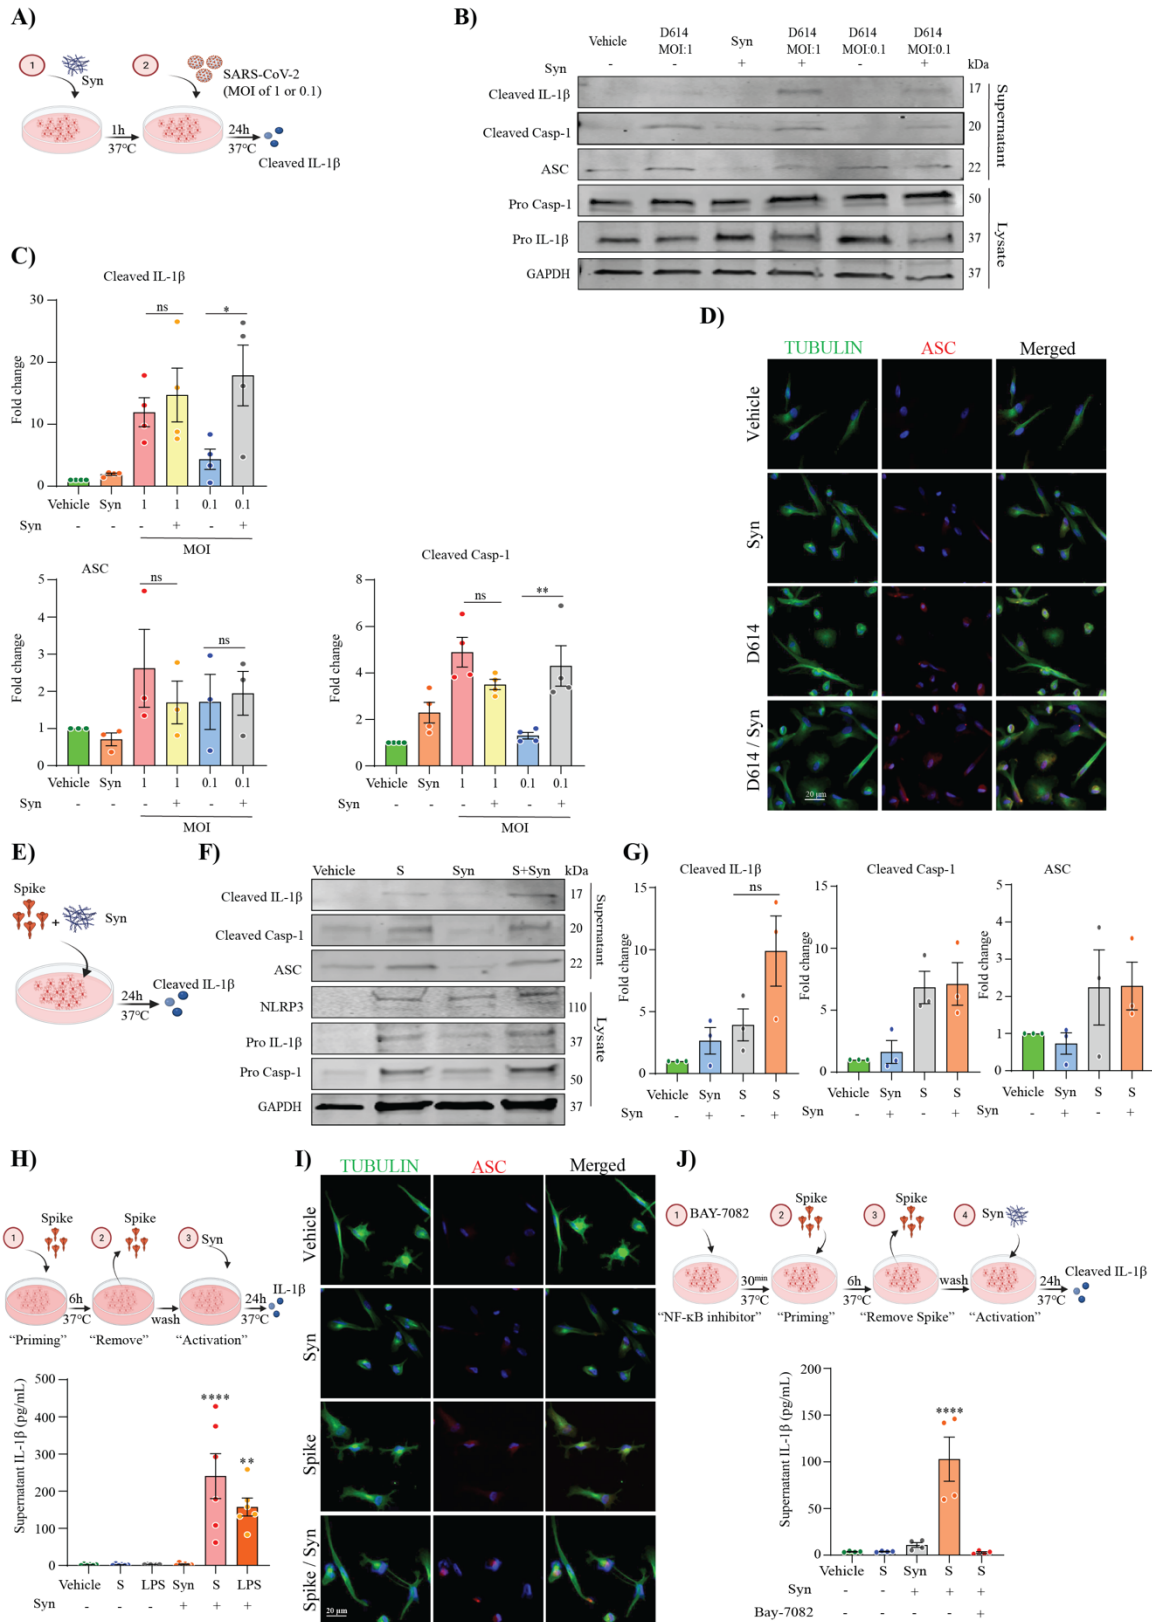

377



378 **Figure 6. SARS-CoV-2 promotes  $\alpha$ -synuclein mediated NLRP3 inflammasome**  
379 **activation, priming MDMi through spike protein.** A schematic representation of SARS-  
380 CoV-2 exposure in presence of  $\alpha$ -synuclein (Syn) for 24 hours on MDMi (A). Level of cleaved  
381 IL-1 $\beta$ , in the supernatants of MDMi, treated with either D614 (MOI 1, 0.1) or  $\alpha$ -synuclein  
382 (Syn; 10  $\mu$ M) or together for 24 hours by western blot and densitometric analysis are shown in  
383 panel (B, C), respectively. Expression of GAPDH was determined in cell lysates.  
384 Immunofluorescence staining of MDMi treated with either  $\alpha$ -synuclein (Syn; 10  $\mu$ M) or D614  
385 (MOI 0.1) or together for 24 hours showing tubulin (green) and the formation of a characteristic  
386 inflammasome ASC speck (red) are shown in (D). Scale bar, 20  $\mu$ m. A schematic  
387 representation of spike (S-clamp) exposure in presence of  $\alpha$ -synuclein (Syn) for 24 hours on  
388 MDMi (E). Western blots and densitometric analysis (fold change against vehicle group) for  
389 cleaved caspase-1 (p20), cleaved IL-1 $\beta$ , and ASC in the supernatants of MDMi treated with  
390 either s-clamp (S; 50 $\mu$ g) or  $\alpha$ -synuclein (Syn; 10  $\mu$ M) or together for 24 hours are presented  
391 in panel (F) and (G). A Schematic representation for spike priming (6 hours) followed  $\alpha$ -  
392 synuclein (Syn) activation for 24 hours in (H) and  $\alpha$ -synuclein (Syn; 10  $\mu$ M) –mediated IL-1 $\beta$   
393 secretion (supernatant) in unprimed or S-clamp-primed MDMi (S; 50 $\mu$ g 6 hours) is shown in  
394 panel (I). LPS-primed cells were used as a positive control (200 ng/ml 3 hours). Representative  
395 immunofluorescence of S-clamp (spike; 50 $\mu$ g 6 hours) primed MDMI activated with  $\alpha$ -  
396 synuclein (Syn; 10  $\mu$ M) for 24 hours showing staining for Tubulin (green) and ASC speck  
397 formation (red) in panel (J). A schematic representation for NF-kB inhibition on spike-primed  
398 MDMi (6 hours) followed  $\alpha$ -synuclein (Syn) activation for 24 hours (K). IL-1 $\beta$  secretion in  
399 vehicle (untreated) or S-clamp-primed MDMIs exposed to  $\alpha$ -synuclein (Syn; 10  $\mu$ M) in  
400 presence or absence of Bay11-7082(3  $\mu$ M) for 24 hours in panel (L). Data are means  $\pm$  SEM  
401 from at least three different donors. \*P < 0.05, \*\*P < 0.01 and \*\*\*\* P < 0.0001 by one-way  
402 analysis of variance (ANOVA) with Tukey's post hoc test.

403

404

## 405 DISCUSSION

406 Several recent clinical studies have documented increased inflammasome activity in response  
407 to SARS-CoV-2 infection, leading to immune dysregulation that is associated with COVID-19  
408 severity (41-43). In the periphery, it has been observed that monocytes from COVID-19  
409 patients have increased caspase-1 activation, and this was correlated with higher levels of  
410 plasma IL-1 $\beta$  in critically ill patients (39, 44). In the CNS, SARS-CoV-2 mediated activation  
411 of the inflammasome in microglia has not previously been directly demonstrated, but there is  
412 increasing evidence for microglial activation in COVID-19 patient brains. For example, post-  
413 mortem brain analysis from COVID-19 deceased patients identified enlargement of microglial  
414 cell soma and thickening of processes detected by staining of microglial markers Iba1, and  
415 TMEM119 (15, 16). Further, in three recent post-mortem COVID-19 cases, SARS-CoV-2  
416 nucleocapsid protein, ACE2, and NLRP3 were found together in microglia (45). Building on

417 these observational studies, here we provide mechanistic insight into the molecular  
418 requirements of SARS-CoV-2 inflammasome activation in human microglial cells.

419 SARS-CoV-2 entry into host cells has been thoroughly described and is mediated by the  
420 binding of viral spike protein to the human receptor ACE2 (46, 47). Our results show that  
421 microglial cells express ACE2 receptor, and although the level is relatively low, SARS-CoV-  
422 2 is able to enter these cells but does not establish viral replication (Figure1). This has also  
423 been shown for human *in vitro* differentiated myeloid dendritic cells (mDC) as well as M1 and  
424 M2 macrophages, where in contrast to Vero E6 controls, no infectious virus production of  
425 SARS-CoV-2 is observed up to 48 hours after inoculation (48). Our data also aligns with the  
426 work of Yang et. al. where it was demonstrated that human pluripotent stem cell (hPSC)-  
427 derived microglia also express ACE2 receptor and are permissive to SARS-CoV-2-pseudo-  
428 virus entry (33). Additionally, this study also found low or undetectable levels of viral RNA in  
429 hPSC-derived microglia exposed to infectious SARS-CoV-2, offering further evidence that  
430 while ACE2 mediated viral uptake is possible, hPSC-derived microglia do not support SARS-  
431 CoV-2 replication (33).

432 We also show that SARS-CoV-2 can activate the inflammasome in human microglia, through  
433 the read-out of cleaved IL-1 $\beta$ , cleaved caspase-1, and ASC speck formation in the supernatant  
434 (Figure 2). As it has been previously demonstrated that the interaction between ACE2 receptor  
435 and spike protein can induce the hyperactivation of NLRP3 in endothelial cells (49), we  
436 investigated the role of spike-ACE2 interaction relative to NLRP3 activation in microglia using  
437 a prefusion-stabilized SARS-CoV-2 spike protein (S-clamp) (36). To confirm that NLRP3  
438 activation on MDMi was ACE2 dependent we used a soluble human ACE2 receptor (hACE2-  
439 FcM), an ACE2 inhibitor (MLN-4760), and a well characterized monoclonal antibody (3E8)  
440 (38). All three approaches confirmed that spike protein can activate NLRP3 in human  
441 microglia-like cells through ACE2.

442 Although we demonstrated that spike protein can activate the NLRP3 inflammasome in human  
443 microglia, it is worth noting that SARS-CoV-2 also encodes other viral proteins that could be  
444 involved in inflammasome activation. SARS-CoV-2 is comprised of a nucleocapsid protein  
445 (N), spike protein (S), membrane protein (M), and envelope protein (E), in addition to a series  
446 of accessory proteins (ORF3a, ORF6, ORF7a, ORF7b, ORF8, and ORF10). Previous studies  
447 with the original SARS coronavirus, SARS-CoV have shown that protein E and ORF3a  
448 activate NLRP3, forming multimeric complexes that act as ion channels activating the NLRP3  
449 inflammasome with IL-1 $\beta$  release, driven through NF- $\kappa$ B (50-52). Moreover, recent evidence

450 demonstrated that N-protein interacts directly with NLRP3, promoting the binding of NLRP3  
451 with ASC, facilitating NLRP3 inflammasome assembly indicating another distinct mechanism  
452 of direct inflammasome activation through interaction of a viral protein with NLRP3 (53). Our  
453 findings now provide further information that SARS-CoV-2 spike protein contributes directly  
454 to activating the NLRP3 inflammasome through ACE2.

455 Priming of the inflammasome in cells is process necessary to induce transcriptional up-  
456 regulation of NLRP3 and pro-IL-1 $\beta$  (54). Our initial observation that the SARS-CoV-2 virus  
457 itself can trigger inflammasome activation in MDMi without the need for priming supports a  
458 role for vigorous virus-mediated inflammasome activation *in vivo*. We also confirmed that  
459 spike protein alone can prime the inflammasome through NF- $\kappa$ B in MDMi, allowing for  
460 NLRP3 activation with classical inflammasome activators ATP and nigericin, as has been  
461 previously reported in human monocytes, macrophages, and human lung epithelial cells (55,  
462 56). These findings support that human coronavirus spike protein can induce innate immune  
463 responses through NF- $\kappa$ B signalling.

464 We previously documented that activation of microglial NLRP3 inflammasomes through  $\alpha$ -  
465 synuclein fibrils is a major driver of dopaminergic neuronal loss in experimental PD (5). The  
466 accumulation of  $\alpha$ -synuclein aggregates, as seen in Lewy bodies, and their spread throughout  
467 the brain is correlated with the stages of PD progression (57). Of importance to the present  
468 study, there are increasing reports of significant neurological complications from SARS-CoV-  
469 2 infection in human patients (15-17, 21, 58, 59). The correlation between viral infection and  
470 the manifestation of Parkinson-like symptoms has been described for a variety of viruses  
471 including influenza virus, Japanese encephalitis virus (JEV), and West Nile virus (WNV)  
472 infection resulting in tremor, myoclonus, rigidity, bradykinesia, and postural instability (60).  
473 Moreover, post-mortem analysis performed on WNV-infected individuals showed an increased  
474 level of  $\alpha$ -synuclein (61). This finding prompted the hypothesis that  $\alpha$ -synuclein is upregulated  
475 during infection as an antiviral factor in neurons, where it is proposed to act as a natural  
476 antimicrobial peptide to restrict viral infection in the brain (61, 62). However, a recent study  
477 indicated that there were no alterations in  $\alpha$ -synuclein levels in serum and CSF of COVID-19  
478 patients with neurological symptoms (63). These findings suggest that the reported cases of  
479 parkinsonism after SARS-CoV-2 infection could be a consequence of an increased  
480 proinflammatory environment, mediated by blood brain barrier (BBB) disruption (64),  
481 peripheral cell infiltration (65), and microglial activation (66). These processes could be  
482 enhanced in the presence of ongoing synucleinopathies, or risk factors such as aging and poor

483 health, leading to an accelerated neuronal loss, correlated with the reported parkinsonism  
484 symptoms and possible susceptibilities to developing PD post-SARS-CoV-2 infection.

485 Here we addressed the impact of SARS-CoV-2 on microglia in presence of  $\alpha$ -synuclein. We  
486 showed that SARS-CoV-2 promotes  $\alpha$ -synuclein mediated NLRP3 inflammasome activation  
487 by priming MDMi through spike protein, providing *ex vivo* support for the negative impact of  
488 SARS-CoV-2 on neurodegenerative diseases such as PD. It is also worth noting that there are  
489 several lines of evidence in the literature indicating neurological complications resulting from  
490 SARS-CoV-2 infection. These include: *i*) neuroinvasion by SARS-CoV-2 is demonstrated in  
491 humans, macaques and mice overexpressing human ACE2 (15, 67-70); *ii*) an extended  
492 microglial activation with pronounced neuroinflammation is reported in brain autopsies  
493 obtained from deceased SARS-CoV-2 patients (15, 16, 71); *iii*) significant deterioration of  
494 motor performance and motor-related disability is seen in PD patients recovering from  
495 COVID-19 (72, 73); and *iv*) Lewy body formation occurs in SARS-CoV-2 infected macaques  
496 (70). Thus, our finding complements the knowledge-gap in molecular mechanisms by which  
497 SARS-CoV-2 may activate microglia and lead to neurological manifestations. Our data suggest  
498 that the spike protein-mediated priming and/or activation of microglia through the ACE2-NF-  
499 kB axis may promote NLRP3 inflammasome activation leading to neuroinflammation and  
500 neurological phenotypes. Further, this process may be enhanced in the presence of  
501 neurodegenerative disease triggers such as  $\alpha$ -synuclein aggregates, supporting a possible role  
502 for COVID-19 in triggering brain diseases such as PD. Since NLRP3 inhibitors are currently  
503 in clinical development for neurodegenerative diseases, including PD (5, 74), these findings  
504 also support a potential therapeutic avenue for treatment of SARS-CoV-2 driven neurological  
505 manifestations.

506

## 507 **MATERIALS AND METHODS**

### 508 **Study design**

509 Studies were primarily designed (i) to determine whether increased NLRP3 inflammasome  
510 activation occurs in human monocyte-derived microglia (MDMi) exposed to SARS-CoV-2  
511 isolates and (ii) to evaluate this activation in the presence of preformed fibrils of  $\alpha$ -Synuclein  
512 (Syn).

513

514 **Ethics and biological safety**

515 Ethical approval for collecting and utilising human donor blood was obtained from The  
516 University of Queensland Human Research Ethics Committee (HREC approval  
517 #2020000559). All experiments with pathogenic SARS-CoV-2 were conducted under a  
518 certified biosafety level-3 (BSL-3) conditions in the School of Chemistry and Molecular  
519 Biosciences at The University of Queensland (SCMB-UQ). All personnel used powered air  
520 purifying respirator (PAPR; SR500 Fan Unit) as a respiratory protection at all the time within  
521 the facility. Surface disinfection was performed using 70% ethanol, while liquid and solid  
522 waste were steam-sterilized by autoclave. This work was approved by the Institutional  
523 Biosafety Committee from The University of Queensland (UQ) (UQ IBC, approvals  
524 IBC/390B/SCMB2020, IBC/1301/SCMB/2020, IBC/376B/SBMS/2020 and  
525 IBC/447B/SCMB/2021).

526 **Cells lines**

527 Vero E6 cells (African green monkey kidney cell clones) and Caco-2 (human colorectal  
528 adenocarcinoma cells), and human embryonic kidney 293T cells (HEK293T) were maintained  
529 in Dulbecco's Modified Eagle Medium (DMEM) supplemented with 10% heat inactivated  
530 foetal calf serum (FCS) (Bovogen, USA), penicillin (100 U/mL) and streptomycin (100 µg/mL)  
531 (P/S) and maintained at 37 °C with 5 % CO<sub>2</sub>. All cell lines were verified to be mycoplasma  
532 free by first culturing the cells in antibiotic-free media and then subjected to a mycoplasma  
533 tested using MycoAlert™ PLUS Mycoplasma Detection Kit (Lonza, UK).

534 **Generation of human Monocyte-Derived Microglia (MDMi)**

535 Monocytes were isolated from healthy donor blood collected into lithium heparin vacutainer  
536 tubes (Becton Dickinson) by a qualified phlebotomist, or from buffy coats obtained from  
537 Australian Red Cross Lifeblood as previously described (75). Briefly, donor blood or buffy  
538 coat was diluted 1:1 with phosphate buffered saline (PBS) and transferred into sterile SepMate  
539 50 (STEMCELL Technologies, BC, Canada) as per manufacturer's instructions. Peripheral  
540 blood monocytes (PBMCs) were collected. Monocytes were positively selected from whole  
541 PBMCs using anti CD14<sup>+</sup> microbeads (Miltenyi Biotec) and plated at the following densities  
542 per well:  $1 \times 10^5$  cells (96-well plate) and  $3 \times 10^5$  cells (24-well plate). To induce the  
543 differentiation of MDMi, we incubated monocytes under serum-free conditions using RPMI-  
544 1640 Glutamax (Life Technologies) with 1% penicillin/ streptomycin (Lonza) and Fungizone  
545 (2.5 µg/ml; Life Technologies) and a mixture of the following human recombinant cytokines:

546 M-CSF (10 ng/ml; Preprotech, 300-25), GM-CSF (10 ng/ml; Preprotech,300-03), NGF- $\beta$  (10  
547 ng/ml; Preprotech, 450-01), MCP-1(CCL2) (100 ng/ml; Preprotech, 300-04), and IL-34 (100  
548 ng/ml; Preprotech, 200-34-250) under standard humidified culture conditions (37°C, 5% CO<sub>2</sub>)  
549 for up to 14 days. Differentiation of PBMCs into MDMi was confirmed by western blot and  
550 immunofluorescence for microglial markers compared to monocyte-derived macrophages  
551 (MDM).

## 552 **MDMi Treatments**

553 For inflammasome activation experiments, MDMi were primed with 200 ng/ml of ultrapure  
554 LPS (*E.Coli* 0111:B4, Invivogen) for 3 hours or 50  $\mu$ g of S-clamp or F-clamp for 6 hours. Cells  
555 were washed in after priming to remove residual LPS or S-Clamp and cells were stimulated  
556 with conventional NLRP3 inflammasome activators ATP (5 mM, Sigma) and nigericin (10  
557  $\mu$ M, Invivogen), or fibrillar  $\alpha$ -synuclein (10  $\mu$ M, Proteos), S-Clamp (2-50  $\mu$ g) or SARS-CoV-  
558 2 isolates (MOI 0.1, 1) for the indicated time. For priming studies MDMis were pre-treated  
559 with the NF-kB inhibitor, Bay 11-7082 (3  $\mu$ M, Sigma), before stimulation with S-clamp and  
560 the addition of ATP, nigericin or  $\alpha$ -synuclein. For inhibition studies, MCC950 (10  $\mu$ M), VX-  
561 765 (20 $\mu$ M, Invivogen) and MLN-4760 (1,10  $\mu$ M, Sigma) were added after the priming step.  
562 At the end of treatment, the supernatant was collected and stored at -80°C until analysis by  
563 enzyme-linked immunosorbent assay (ELISA) or western blotting.

564

## 565 **Quantification of Caspase-1 Mediated Pyroptosis**

566 At the end of each treatment, supernatants were collected and LDH release was quantified  
567 using an LDH assay kit (TOX7-Sigma) as per the manufacturer's instructions. Caspase-1  
568 dependent LDH release that was inhibited by the caspase-1 inhibitor VX-765 (20  $\mu$ M), was  
569 used as a readout for pyroptosis as previously described (76).

## 570 **Viral isolate**

571 SARS-CoV-2 were isolated from patient nasopharyngeal aspirates via inoculation in Vero E6  
572 cells. An early Australian isolate hCoV-19/Australia/QLD02/2020 (QLD02) (GISAID  
573 Accession ID; EPI\_ISL\_407896) sampled on 30/01/2020 and named in this study as D614.  
574 This virus isolated was provided by Queensland Health Forensic & Scientific Services,  
575 Queensland Department of Health as passage 2 in Vero E6 cells. Viral stocks (passage 3) were  
576 then generated on VeroE6 cells and stored at -80 °C. To ensure there was no passage-to-passage  
577 variation of viruses used in this study or loss of the spike furin cleavage on VeroE6 passaged



578 SARS-CoV-2 isolate whole SARS-CoV-2 sequencing and variant bioinformatics analysis was  
579 conducted as per (34) to QLD02 isolate. Briefly, the nCoV-2019 Nanopore sequencing  
580 protocol v3 (Josh Quick, University of Birmingham) was used with minor modifications. RNA  
581 was isolated from cell culture supernatant, and cDNA generated using Protoscript II first-strand  
582 cDNA synthesis kit as per manufacturer's protocol (New England Biolabs, USA). SARS-CoV-  
583 2 cDNA was subsequently amplified using ARTIC network v2 primers using two-step PCR  
584 amplification with Q5® High-Fidelity DNA Polymerase (New England Biolabs, USA). PCR  
585 fragments were purified using AMPure XP beads (Beckman Coulter, USA) and subjected to  
586 End Repair/dA-Tailing using the NEBNext® Ultra™ II Module (New England Biolabs, USA).  
587 Passage 3 of QLD02 sample was multiplexed using the Native Barcoding Expansion kit (EXP-  
588 NBD104, Oxford Nanopore, UK) and Ligation Sequencing Kit (SQK-LSK109, Oxford  
589 Nanopore, UK). Prepared libraries were then quantified and loaded into equimolar  
590 concentrations totalling 20 fmol into a Flongle flow cell (FLOFLGOP1, Oxford Nanopore,  
591 UK). Variant analysis was conducted using iVar (v1.2.2) (77) and depth of sequencing  
592 coverage and consensus positions were visualized and calculated using Integrative Genomics  
593 Viewer (Version: 2.7.0). Virus stock titre was determined by an immuno-plaque assay (iPA) as  
594 previously described (78).

### 595 **Growth Kinetics**

596 SARS-CoV-2 (D614) replication kinetics were assessed on VeroE6, Caco3, mouse primary  
597 microglia and MDMi cells. Briefly,  $5 \times 10^5$  cells were seeded in 24-well plates one day before  
598 infection. Cells were infected at a MOI of 1 or 0.1 for 30 min at 37 °C. The monolayer was  
599 washed five times with 1mL of additive-free DMEM and finally incubated with 1 mL of  
600 DMEM (supplemented with 2% FCS and P/S) at 37 °C with 5% CO<sub>2</sub>. Infectious viral titres  
601 were assessed in samples harvested from supernatant at the time points; 0-, 1-, 2- and 3-days  
602 post-infection (dpi). The viral titre was determined by an immuno-plaque assay (iPA) on  
603 VeroE6 cells. Two independent experiments were performed with 2 technical replicates.

### 604 **Binding assay**

605 Vero E6 and MDMi cells were inoculated with an MOI=1 of SARS-CoV-2 (D614) for 2 hours  
606 at 4 °C and then, cells were washed 8 times with fresh cold media to remove unbound viruses.  
607 Cells were then harvested in TRI Reagent (Millipore, Sigma-Aldrich, Germany) and a total  
608 RNA was purified and quantified by a real time RT-PCR.

609

610 **RNA extraction**

611 RNA was extracted using TRIzol (Thermo Fisher) plus an RNA extraction RNeasy Micro kit  
612 (Qiagen). Briefly, the aqueous phase containing the RNA was separated by adding chloroform  
613 to the TRIzol samples and centrifuging them for 30 min, 4°C at 12,000 g. An equal volume of  
614 70% ethanol was added to the isolated aqueous phase, mixed and then added to the RNeasy  
615 MinElute spin column. The following washes, DNase I treatment and elute steps were  
616 performed as described in the Qiagen RNeasy Micro Handbook. RNA samples were eluted in  
617 RNase free water.

618

619 **Quantitative Real-time PCR**

620 One-step quantitative real-time PCR was performed in a QuantStudio 6 (Thermo Fisher) using  
621 GoTaq® Probe 1-Step RT-qPCR System (Promega). The CDC SARS-CoV-2 nucleoprotein  
622 N2 primer set was used for amplification. Forward: 5'-TTA CAA ACA TTG GCC GCA AA-  
623 3', Reverse: 5'-GCG CGA CAT TCC GAA GAA-3' and Probe: 5'-FAM-ACA ATT TGC  
624 CCC CAG CGC TTC AG-BHQ1-3' (79). The standard curve was done using the 2019-  
625 nCoV\_N Positive Control nucleoprotein DNA (IDT). A fixed volume representing 1/16 of the  
626 total RNA contained in each sample (well) was added to the master mix. Total number of  
627 copies were calculated using a semi-log line regression using GraphPad Prism 8.0.1. The  
628 human ACE2 transcript variant 2 was amplified using the OriGene primer set Forward: 5'-  
629 TCC ATT GGT CTT CTG TCA CCC G-3' and Reverse: 5'-AGA CCA TCC ACC TCC ACT  
630 TCT C-3'. HPRT was use as the control housekeeping gene using primers, Forward: 5'-TCA  
631 GGC AGT ATA ATC CAA AGA TGG T-3' and Reverse: 5'-AGT CTG GCT TAT ATC CAA  
632 CAC TTC G-3'. The relative expression is equal to the  $2^{(-\Delta Ct)}$ .

633 **Pseudo-virus entry assay**

634 Pseudo-virus particles for SARS-CoV-2 were generated by using a lentiviral-based pseudo-  
635 particles system as previously described (32). Briefly, HEK293T cells were co-transfected with  
636 the following plasmids: 1 µg of p8.91 (encoding a second-generation lentiviral packaging  
637 plasmid for HIV-1 gag-pol), 1.5 µg of pCSFLW (firefly luciferase reporter gene) and, 1 µg of  
638 plasmid encoding SARS-CoV2 spike (D614) with C-terminal 18 amino acid deletion using  
639 Lipofectamine LTX Plus reagent (Invitrogen, USA) as per manufacturer's protocol. A non-  
640 glycoprotein control (NE) was also generated using the same combination of plasmids as

641 above, replacing plasmid encoding SARS-CoV2 spike, with 1 µg of an empty plasmid vector  
642 (pcDNA2.1).

643

644 Fourteen hours post-transfection, the medium was replaced with DMEM supplemented with  
645 10% FCS and P/S and maintained at 37 °C with 5 % CO<sub>2</sub> for 3 days. The supernatant containing  
646 SARS-CoV-2 pseudo-virus particles and the non-glycoprotein control (NE) was spun down at  
647 3000 × g for 10 min at 4°C to remove cellular debris, aliquoted and stored at –80°C. To validate  
648 the pseudo-virus activity, approximately 2 x 10<sup>4</sup> cells/well of HEK293T were seeded on a black  
649 flat-bottomed 96-well plate (Corning, USA) precoated with poly-L-lysine and incubated  
650 overnight at 37 °C with 5 % CO<sub>2</sub>. SARS-CoV-2 pseudo-virus particles and the non-  
651 glycoprotein control (NE) were diluted 1:5 and 1:20 in DMEM media supplemented with 10%  
652 FCS and P/S before infecting the cells with 100µL. HEK293T were incubated at 37 °C with 5  
653 % CO<sub>2</sub> for 3 days. The intracellular luciferase level was measured on Varioskan LUX  
654 multimode microplate reader (ThermoFisher, USA) by replacing the medium with 50 µL  
655 Bright-Glo substrate (Promega, USA), as per manufacturer’s protocol. The results showed a  
656 high level of intracellular luciferase in HEK293T compared to the non-glycoprotein control  
657 (NE) validating this batch of pseudo-virus particle for SARS-CoV-2 used in this study  
658 (Supplementary file 2). MDMi and Vero E6 were treated similarly with 1:5 dilution of Pseudo-  
659 virus particles stock and the level of intracellular luciferase was measured after 3 days.

#### 660 **Plaque Reduction Neutralisation Test (PRNT)**

661 The neutralisation levels of a soluble recombinant angiotensin-converting enzyme 2 (ACE2)  
662 receptor against the SARS-CoV-2 (D614) were verified by iPA (78) . The generation of a  
663 soluble recombinant version of human ACE2 protein was recently described (36).

#### 664 **Purification and analysis of Nipah F-clamp and SARS-CoV-2 S-clamp proteins:**

665 SARS-CoV-2, termed S-clamp, Nipah F-clamp (GenBank: NP\_112026.1) and the soluble  
666 hACE2 proteins were expressed in ExpiCHO cells and purified as previously described (36,  
667 80). Purified proteins were then characterised via SDS-PAGE, ELISA using ectodomain-  
668 specific monoclonal antibodies and size-exclusion chromatography. For SDS-PAGE, 4 µg of  
669 purified protein was mixed with DTT and analysed using a NuPAGE™ 4-12% Bis-Tris mini  
670 protein gel (ThermoFisher) as per the manufacturer’s instructions. Proteins were visualised by  
671 Coomassie staining.

672 For ELISA analysis, Nipah F-clamp, or SARS-CoV-2 S-clamp proteins were diluted to 2  
673  $\mu\text{g}/\text{mL}$  in PBS and coated overnight on Nunc MaxiSorp ELISA plates. The next day, plates  
674 were blocked with 150  $\mu\text{L}/\text{well}$  of 5% KPL Milk Diluent/Blocking Solution Concentrate  
675 (SeraCare) in PBS with 0.05% Tween 20 (PBS.T) for 1 hour at room temperature. Blocking  
676 buffer was removed, and serial dilutions of Nipah F- or SARS-CoV-2 S ectodomain-specific  
677 antibodies, 5B3 and CR3022 (81), were added. Plates were incubated for 1 hour at 37 °C before  
678 they were washed three times with water and patted dry. Next, an HRP-conjugated goat anti-  
679 human secondary antibody (ThermoFisher) was added, and the plates incubated for 1 hour at  
680 37 °C. The plates were washed and dried as above before the addition of TMB Single Solution  
681 chromogen/substrate (Invitrogen). Plates were allowed to develop for 5 minutes at room  
682 temperature before the reaction was stopped by the addition of 2N  $\text{H}_2\text{SO}_4$ . Absorbance at 450  
683 nm was read on a Varioskan LUX Multimode Microplate Reader (ThermoFisher). Data were  
684 analysed using GraphPad Prism version 8 using a one site – specific binding model.

685

686 Nipah F-clamp and SARS-CoV-2 S-clamp proteins were further analysed for their oligomeric  
687 state via size-exclusion chromatography using a Superdex 200 Increase 10/300 GL or Superose  
688 6 Increase 10/300 GL column, respectively. Approximately 30-50  $\mu\text{g}$  of protein in PBS was  
689 loaded onto the column using an ÄKTA pure FPLC system at a flowrate of 0.5 mL/ minute.

690 The limulus amoebocyte lysate (LAL) based testing of endotoxin levels of the purified proteins  
691 were performed using Endosafe®-PTS™ device and cartridges according to the  
692 manufacturer's protocol (Charles River). Additionally, low endotoxin levels for the soluble  
693 hACE2, and monoclonal antibodies (3E8 and CO5) were also produced and validated by SDS-  
694 PAGE and ELISA. For ELISAs, 2 $\mu\text{g}/\text{mL}$  in PBS of S-clamp or recombinant hACE2 or  
695 Hemagglutinin (HA) from influenza A H3 (Switzerland 2013) were coated overnight on Nunc  
696 MaxiSorp ELISA plates and then used to validate the hACE2, 3E8 and CO5 proteins  
697 respectively. The endotoxin levels were 1.1 EU/mg, 5.9 EU/mg, < 5 EU/mg, < 5 EU/mg and  
698 124 EU/mg for SARS-CoV-2 S-clamp, Nipah F-clamp, hACE2, 3E8 and CO5 proteins,  
699 respectively.

## 700 **Preparation of fibrillar $\alpha$ -synuclein**

701 Recombinant human  $\alpha$ -synuclein monomer was obtained from Proteos, and *in vitro* fibril  
702 generation was performed with a final concentration of 2 mg/ml in phosphate-buffered saline  
703 (PBS) by incubation at 37°C with agitation in an orbital mixer (400 rpm) for 7 days with daily  
704 cycles of sonication used to break down fibrillar aggregates as outlined previously (5). The

705 generation of fibrillar  $\alpha$ -synuclein species was confirmed by transmission electron microscopy  
706 and Thioflavin T fluorescence prior to use.

### 707 **Western blotting**

708 Primary microglial cells were collected and lysed using RIPA buffer (ThermoFisher). Proteins  
709 were separated in precast BioRad gradient (4-20%) gels. Proteins were then transferred to a  
710 nitrocellulose membrane and blocked for 1 h at room temperature (RT) using fluorescence  
711 western blocking buffer (Licor Bioscience). Membranes were washed 5 times with 5 min  
712 incubations per wash using either PBS containing 0.05% Tween-20 or  
713 tris(hydroxymethyl)aminomethane (Tris)-buffered saline containing 0.05% Tween-20.  
714 Primary human/rabbit/mouse antibodies, diluted in either Licor blocking buffer or 5% bovine  
715 serum albumin (BSA) solution, were then added to the membranes and incubated overnight at  
716 4°C. Glyceraldehyde 3-phosphate dehydrogenase (GAPDH) was used as loading controls.  
717 Following 5 washes, respective infrared-dye or horseradish peroxidase (HRP) conjugated  
718 secondary antibodies against primary antibodies was added to the membranes for 1 hour at RT.  
719 Bands were visualised using either the Odyssey CLx imaging system (LI-COR) or enhanced  
720 chemiluminescence via SuperSignal® West Pico Plus Chemiluminescent Substrate (Thermo-  
721 Scientific) accordingly to manufacturer's instructions. Densitometric analysis was performed  
722 using Image Studio Lite software and the normalized band intensities were expressed as fold  
723 change over the control group.

724

### 725 **ELISA**

726 Human IL-1 beta/IL-1F2 DuoSet ELISA kit (R&D Systems, Catalog # DY201 was used to  
727 measure IL-1 $\beta$  in the supernatants of activated microglia. The assay was carried out according  
728 to the manufacturer's instructions.

### 729 **MDMI Immunocytochemistry**

730 MDMI cells were fixed with 4% paraformaldehyde in PBS for 10min. Cells were  
731 permeabilised with 0.1% triton X-100, subsequently washed three times in PBS, then blocked  
732 with 3% donkey serum in PBS for 1 hr at room temperature. Following this, cells were  
733 incubated for 2 hrs at room temperature with combinations of the following antibodies: rabbit  
734 anti-TMEM (1:100), rabbit anti-ASC (1:250), and mouse anti-Tubulin (1:250). Cells were then  
735 washed three times with PBS before incubating with secondary antibodies for 1 hr at room  
736 temperature. Secondary antibodies used were Donkey anti-rabbit 555 (1:2000) and donkey

737 anti-mouse 488 (1:2000). Following three washes in PBS, cells were incubated with DAPI  
738 (1:4000 in PBS) before being mounted with Prolong gold antifade medium (Invitrogen) for  
739 fluorescent microscopy.

#### 740 **Fluorescence microscopy methods**

741 Images were collected using a Diskovery spinning disk confocal microscope (Andor/Nikon),  
742 60XC CFI Plan Apochromat WI (NA 1.2) lens, with a disk pinhole size of 70um, and an Andor  
743 Zyla 4.2 sCMOS camera (Andor, UK). Images were collected at 12-bit and 2048 x 2048 pixel  
744 resolution. System settings, camera exposure times, and image brightness and contrast were  
745 consistent across all samples and optimised on Imaris 9.1.0 (Bitplane, UK) to create  
746 representative images for presentation. Samples were stained using the following fluorescent  
747 secondary antibodies: Donkey anti-rabbit Alexa Fluor® 555, Donkey anti-mouse Alexa  
748 Fluor® 488, and DAPI nuclear stain (brand). These fluorophores were then captured using  
749 laser lines 561nm, 488nm, and 405nm for excitation with appropriate filters to maximise  
750 emission photon capture. Images were captured in a Z-stack for intracellular ASC speck  
751 visualisation, with a step size of 0.15um.

#### 752 **Statistical Analysis**

753 All data were analysed using Prism software (GraphPad 9.1.2). For growth kinetics, a multiple  
754 comparison using two-way ANOVA test with Sidak's correction was used to compare within  
755 groups. Statistical significance was set at 95 % ( $p = 0.05$ ). For PRNT, a nonlinear regression  
756 with Inhibitor vs. response (three parameters) model was used to determine the best-fit curve.  
757 Data are represented as mean  $\pm$  s.e.m. from at least 3 experiments or donors. ANOVA  
758 followed by Tukey's post-test was performed to compare all treatment groups in densitometries  
759 and ELISA. \* $P < 0.05$ , \*\* $P < 0.01$ , and \*\*\* $P < 0.001$  denote statistically significant differences  
760 between indicated groups.

761

#### 762 **ACKNOWLEDGMENTS**

763

764 We would like to thank the Queensland Health Forensic and Scientific Services, Queensland  
765 Department of Health, for providing the QLD02 SARS-CoV-2 isolate. We acknowledge  
766 funding support from the National Health and Medical Research Council (2009957), The  
767 Australian Infectious Diseases Research Centre (COVID-19 seed grant to AAK), and the  
768 Medical Research Future Fund (APP1202445-2020 MRFF Novel Coronavirus Vaccine  
769 Development Grant).



770 **REFERENCES**

771  
772

- 773 1. E. A. Albornoz, T. M. Woodruff, R. Gordon, Inflammasomes in CNS Diseases. *Exp*  
774 *Suppl* **108**, 41-60 (2018).
- 775 2. S. Voet, S. Srinivasan, M. Lamkanfi, G. van Loo, Inflammasomes in  
776 neuroinflammatory and neurodegenerative diseases. *EMBO Mol Med* **11** (2019).
- 777 3. F. Martinon, K. Burns, J. Tschopp, The inflammasome: a molecular platform triggering  
778 activation of inflammatory caspases and processing of proIL-beta. *Mol Cell* **10**, 417-  
779 426 (2002).
- 780 4. J. G. Walsh, D. A. Muruve, C. Power, Inflammasomes in the CNS. *Nat Rev Neurosci*  
781 **15**, 84-97 (2014).
- 782 5. R. Gordon *et al.*, Inflammasome inhibition prevents alpha-synuclein pathology and  
783 dopaminergic neurodegeneration in mice. *Sci Transl Med* **10** (2018).
- 784 6. M. T. Heneka *et al.*, NLRP3 is activated in Alzheimer's disease and contributes to  
785 pathology in APP/PS1 mice. *Nature* **493**, 674-678 (2013).
- 786 7. V. Deora *et al.*, The microglial NLRP3 inflammasome is activated by amyotrophic  
787 lateral sclerosis proteins. *Glia* **68**, 407-421 (2020).
- 788 8. D. K. Kaushik, M. Gupta, K. L. Kumawat, A. Basu, NLRP3 inflammasome: key  
789 mediator of neuroinflammation in murine Japanese encephalitis. *PLoS One* **7**, e32270  
790 (2012).
- 791 9. W. Wang *et al.*, Zika virus infection induces host inflammatory responses by  
792 facilitating NLRP3 inflammasome assembly and interleukin-1beta secretion. *Nat*  
793 *Commun* **9**, 106 (2018).
- 794 10. K. V. Swanson, M. Deng, J. P. Ting, The NLRP3 inflammasome: molecular activation  
795 and regulation to therapeutics. *Nat Rev Immunol* **19**, 477-489 (2019).
- 796 11. G. De Chiara *et al.*, Infectious agents and neurodegeneration. *Mol Neurobiol* **46**, 614-  
797 638 (2012).
- 798 12. L. Ferini-Strambi, M. Salsone, COVID-19 and neurological disorders: are  
799 neurodegenerative or neuroimmunological diseases more vulnerable? *J Neurol* **268**,  
800 409-419 (2021).
- 801 13. J. Liu *et al.*, SARS-CoV-2 cell tropism and multiorgan infection. *Cell Discov* **7**, 17  
802 (2021).
- 803 14. V. G. Puelles *et al.*, Multiorgan and Renal Tropism of SARS-CoV-2. *N Engl J Med*  
804 **383**, 590-592 (2020).
- 805 15. K. T. Thakur *et al.*, COVID-19 neuropathology at Columbia University Irving Medical  
806 Center/New York Presbyterian Hospital. *Brain* 10.1093/brain/awab148 (2021).
- 807 16. J. Matschke *et al.*, Neuropathology of patients with COVID-19 in Germany: a post-  
808 mortem case series. *Lancet Neurol* **19**, 919-929 (2020).
- 809 17. M. A. Ellul *et al.*, Neurological associations of COVID-19. *Lancet Neurol* **19**, 767-783  
810 (2020).
- 811 18. M. Merello, K. P. Bhatia, J. A. Obeso, SARS-CoV-2 and the risk of Parkinson's disease:  
812 facts and fantasy. *Lancet Neurol* **20**, 94-95 (2021).
- 813 19. S. Najjar *et al.*, Central nervous system complications associated with SARS-CoV-2  
814 infection: integrative concepts of pathophysiology and case reports. *J*  
815 *Neuroinflammation* **17**, 231 (2020).
- 816 20. A. Siderowf *et al.*, Impaired olfaction and other prodromal features in the Parkinson  
817 At-Risk Syndrome Study. *Mov Disord* **27**, 406-412 (2012).

- 818 21. M. E. Cohen *et al.*, A case of probable Parkinson's disease after SARS-CoV-2 infection.  
819 *Lancet Neurol* **19**, 804-805 (2020).
- 820 22. A. Mendez-Guerrero *et al.*, Acute hypokinetic-rigid syndrome following SARS-CoV-  
821 2 infection. *Neurology* **95**, e2109-e2118 (2020).
- 822 23. I. Faber *et al.*, Coronavirus Disease 2019 and Parkinsonism: A Non-post-encephalitic  
823 Case. *Mov Disord* **35**, 1721-1722 (2020).
- 824 24. A. Pavel, D. K. Murray, A. J. Stoessl, COVID-19 and selective vulnerability to  
825 Parkinson's disease. *Lancet Neurol* **19**, 719 (2020).
- 826 25. P. Brundin, A. Nath, J. D. Beckham, Is COVID-19 a Perfect Storm for Parkinson's  
827 Disease? *Trends Neurosci* **43**, 931-933 (2020).
- 828 26. K. J. Ryan *et al.*, A human microglia-like cellular model for assessing the effects of  
829 neurodegenerative disease gene variants. *Sci Transl Med* **9** (2017).
- 830 27. B. Korber *et al.*, Tracking Changes in SARS-CoV-2 Spike: Evidence that D614G  
831 Increases Infectivity of the COVID-19 Virus. *Cell* **182**, 812-827 e819 (2020).
- 832 28. J. Yang *et al.*, Molecular interaction and inhibition of SARS-CoV-2 binding to the  
833 ACE2 receptor. *Nat Commun* **11**, 4541 (2020).
- 834 29. R. Chen *et al.*, The Spatial and Cell-Type Distribution of SARS-CoV-2 Receptor ACE2  
835 in the Human and Mouse Brains. *Front Neurol* **11**, 573095 (2020).
- 836 30. L. Schimmel *et al.*, Endothelial cells are not productively infected by SARS-CoV-2.  
837 *Clin Transl Immunology* **10**, e1350 (2021).
- 838 31. N. D'Onofrio *et al.*, Glycated ACE2 receptor in diabetes: open door for SARS-COV-2  
839 entry in cardiomyocyte. *Cardiovasc Diabetol* **20**, 99 (2021).
- 840 32. C. Conceicao *et al.*, The SARS-CoV-2 Spike protein has a broad tropism for  
841 mammalian ACE2 proteins. *PLoS Biol* **18**, e3001016 (2020).
- 842 33. L. Yang *et al.*, A Human Pluripotent Stem Cell-based Platform to Study SARS-CoV-2  
843 Tropism and Model Virus Infection in Human Cells and Organoids. *Cell Stem Cell* **27**,  
844 125-136 e127 (2020).
- 845 34. A. A. Amarilla *et al.*, A versatile reverse genetics platform for SARS-CoV-2 and other  
846 positive-strand RNA viruses. *Nat Commun* **12**, 3431 (2021).
- 847 35. S. S. Ousman, P. Kubes, Immune surveillance in the central nervous system. *Nat*  
848 *Neurosci* **15**, 1096-1101 (2012).
- 849 36. D. Watterson *et al.*, Preclinical development of a molecular clamp-stabilised subunit  
850 vaccine for severe acute respiratory syndrome coronavirus 2. *Clin Transl Immunology*  
851 **10**, e1269 (2021).
- 852 37. L. Wang, Y. Xiang, Spike Glycoprotein-Mediated Entry of SARS Coronaviruses.  
853 *Viruses* **12** (2020).
- 854 38. Y. Chen *et al.*, ACE2-targeting monoclonal antibody as potent and broad-spectrum  
855 coronavirus blocker. *Signal Transduct Target Ther* **6**, 315 (2021).
- 856 39. A. C. Ferreira *et al.*, SARS-CoV-2 engages inflammasome and pyroptosis in human  
857 primary monocytes. *Cell Death Discov* **7**, 43 (2021).
- 858 40. S. J. Theobald *et al.*, Long-lived macrophage reprogramming drives spike protein-  
859 mediated inflammasome activation in COVID-19. *EMBO Mol Med* **13**, e14150 (2021).
- 860 41. J. C. de Rivero Vaccari, W. D. Dietrich, R. W. Keane, J. P. de Rivero Vaccari, The  
861 Inflammasome in Times of COVID-19. *Front Immunol* **11**, 583373 (2020).
- 862 42. A. Kroemer *et al.*, Inflammasome activation and pyroptosis in lymphopenic liver  
863 patients with COVID-19. *J Hepatol* **73**, 1258-1262 (2020).
- 864 43. T. S. Rodrigues *et al.*, Inflammasomes are activated in response to SARS-CoV-2  
865 infection and are associated with COVID-19 severity in patients. *J Exp Med* **218** (2021).

- 866 44. C. Junqueira *et al.*, SARS-CoV-2 infects blood monocytes to activate NLRP3 and  
867 AIM2 inflammasomes, pyroptosis and cytokine release. *medRxiv*  
868 10.1101/2021.03.06.21252796 (2021).
- 869 45. V. F. Cama *et al.*, The microglial NLRP3 inflammasome is involved in human SARS-  
870 CoV-2 cerebral pathogenicity: A report of three post-mortem cases. *J Neuroimmunol*  
871 **361**, 577728 (2021).
- 872 46. C. B. Jackson, M. Farzan, B. Chen, H. Choe, Mechanisms of SARS-CoV-2 entry into  
873 cells. *Nat Rev Mol Cell Biol* 10.1038/s41580-021-00418-x (2021).
- 874 47. J. Shang *et al.*, Cell entry mechanisms of SARS-CoV-2. *Proc Natl Acad Sci U S A* **117**,  
875 11727-11734 (2020).
- 876 48. M. A. Niles *et al.*, Macrophages and Dendritic Cells Are Not the Major Source of Pro-  
877 Inflammatory Cytokines Upon SARS-CoV-2 Infection. *Front Immunol* **12**, 647824  
878 (2021).
- 879 49. M. Z. Ratajczak *et al.*, SARS-CoV-2 Entry Receptor ACE2 Is Expressed on Very Small  
880 CD45(-) Precursors of Hematopoietic and Endothelial Cells and in Response to Virus  
881 Spike Protein Activates the Nlrp3 Inflammasome. *Stem Cell Rev Rep* **17**, 266-277  
882 (2021).
- 883 50. I. Y. Chen, M. Moriyama, M. F. Chang, T. Ichinohe, Severe Acute Respiratory  
884 Syndrome Coronavirus Viroprotein 3a Activates the NLRP3 Inflammasome. *Front*  
885 *Microbiol* **10**, 50 (2019).
- 886 51. J. L. Nieto-Torres *et al.*, Severe acute respiratory syndrome coronavirus E protein  
887 transports calcium ions and activates the NLRP3 inflammasome. *Virology* **485**, 330-  
888 339 (2015).
- 889 52. K. L. Siu *et al.*, Severe acute respiratory syndrome coronavirus ORF3a protein activates  
890 the NLRP3 inflammasome by promoting TRAF3-dependent ubiquitination of ASC.  
891 *FASEB J* **33**, 8865-8877 (2019).
- 892 53. P. Pan *et al.*, SARS-CoV-2 N protein promotes NLRP3 inflammasome activation to  
893 induce hyperinflammation. *Nat Commun* **12**, 4664 (2021).
- 894 54. F. G. Bauernfeind *et al.*, Cutting edge: NF-kappaB activating pattern recognition and  
895 cytokine receptors license NLRP3 inflammasome activation by regulating NLRP3  
896 expression. *J Immunol* **183**, 787-791 (2009).
- 897 55. S. F. Dosch, S. D. Mahajan, A. R. Collins, SARS coronavirus spike protein-induced  
898 innate immune response occurs via activation of the NF-kappaB pathway in human  
899 monocyte macrophages in vitro. *Virus Res* **142**, 19-27 (2009).
- 900 56. S. Khan *et al.*, SARS-CoV-2 spike protein induces inflammation via TLR2-dependent  
901 activation of the NF-kappaB pathway. *bioRxiv* 10.1101/2021.03.16.435700 (2021).
- 902 57. M. B. Fares, S. Jagannath, H. A. Lashuel, Reverse engineering Lewy bodies: how far  
903 have we come and how far can we go? *Nat Rev Neurosci* **22**, 111-131 (2021).
- 904 58. A. Filatov, P. Sharma, F. Hindi, P. S. Espinosa, Neurological Complications of  
905 Coronavirus Disease (COVID-19): Encephalopathy. *Cureus* **12**, e7352 (2020).
- 906 59. P. S. Espinosa, Z. Rizvi, P. Sharma, F. Hindi, A. Filatov, Neurological Complications  
907 of Coronavirus Disease (COVID-19): Encephalopathy, MRI Brain and Cerebrospinal  
908 Fluid Findings: Case 2. *Cureus* **12**, e7930 (2020).
- 909 60. N. Limphaibool, P. Iwanowski, M. J. V. Holstad, D. Kobylarek, W. Kozubski,  
910 Infectious Etiologies of Parkinsonism: Pathomechanisms and Clinical Implications.  
911 *Front Neurol* **10**, 652 (2019).
- 912 61. E. L. Beatman *et al.*, Alpha-Synuclein Expression Restricts RNA Viral Infections in  
913 the Brain. *J Virol* **90**, 2767-2782 (2015).
- 914 62. C. T. Tulisiasak, G. Mercado, W. Peelaerts, L. Brundin, P. Brundin, Can infections trigger  
915 alpha-synucleinopathies? *Prog Mol Biol Transl Sci* **168**, 299-322 (2019).

- 916 63. V. A. Blanco-Palmero *et al.*, Serum and CSF alpha-synuclein levels do not change in  
917 COVID-19 patients with neurological symptoms. *J Neurol* 10.1007/s00415-021-  
918 10444-6 (2021).
- 919 64. M. A. Erickson, E. M. Rhea, R. C. Knopp, W. A. Banks, Interactions of SARS-CoV-2  
920 with the Blood-Brain Barrier. *Int J Mol Sci* **22** (2021).
- 921 65. Y. Wu *et al.*, Nervous system involvement after infection with COVID-19 and other  
922 coronaviruses. *Brain Behav Immun* **87**, 18-22 (2020).
- 923 66. T. E. Poloni *et al.*, COVID-19-related neuropathology and microglial activation in  
924 elderly with and without dementia. *Brain Pathol* 10.1111/bpa.12997, e12997 (2021).
- 925 67. E. Song *et al.*, Neuroinvasion of SARS-CoV-2 in human and mouse brain. *J Exp Med*  
926 **218** (2021).
- 927 68. P. Kumari *et al.*, Neuroinvasion and Encephalitis Following Intranasal Inoculation of  
928 SARS-CoV-2 in K18-hACE2 Mice. *Viruses* **13** (2021).
- 929 69. K. H. Dinno, 3rd *et al.*, A mouse-adapted model of SARS-CoV-2 to test COVID-19  
930 countermeasures. *Nature* **586**, 560-566 (2020).
- 931 70. Ingrid H.C.H.M. Philippens *et al.*, SARS-CoV-2 causes brain inflammation and  
932 induces Lewy body formation in macaques. *bioRxiv*.  
933 [doi.org/10.1101/2021.02.23.432474](https://doi.org/10.1101/2021.02.23.432474) (Preprint posted February 23, 2021) (2021).
- 934 71. M. Schwabenland *et al.*, Deep spatial profiling of human COVID-19 brains reveals  
935 neuroinflammation with distinct microanatomical microglia-T-cell interactions.  
936 *Immunity* **54**, 1594-1610 e1511 (2021).
- 937 72. E. G. Brown *et al.*, The Effect of the COVID-19 Pandemic on People with Parkinson's  
938 Disease. *J Parkinsons Dis* **10**, 1365-1377 (2020).
- 939 73. R. Cilia *et al.*, Effects of COVID-19 on Parkinson's Disease Clinical Features: A  
940 Community-Based Case-Control Study. *Mov Disord* **35**, 1287-1292 (2020).
- 941 74. A. Mullard, NLRP3 inhibitors stoke anti-inflammatory ambitions. *Nat Rev Drug*  
942 *Discov* **18**, 405-407 (2019).
- 943 75. X. X. Li, R. J. Clark, T. M. Woodruff, C5aR2 Activation Broadly Modulates the  
944 Signaling and Function of Primary Human Macrophages. *J Immunol* **205**, 1102-1112  
945 (2020).
- 946 76. V. Deora, E. A. Albornoz, K. Zhu, T. M. Woodruff, R. Gordon, The Ketone Body beta-  
947 Hydroxybutyrate Does Not Inhibit Synuclein Mediated Inflammasome Activation in  
948 Microglia. *J Neuroimmune Pharmacol* **12**, 568-574 (2017).
- 949 77. N. D. Grubaugh *et al.*, An amplicon-based sequencing framework for accurately  
950 measuring intrahost virus diversity using PrimalSeq and iVar. *Genome Biol* **20**, 8  
951 (2019).
- 952 78. A. A. Amarilla *et al.*, An Optimized High-Throughput Immuno-Plaque Assay for  
953 SARS-CoV-2. *Front Microbiol* **12**, 625136 (2021).
- 954 79. D. o. V. D. CDC - National Center for Immunization and Respiratory Diseases  
955 (NCIRD) (2021) CDC 2019-nCoV Real-Time RT-PCR Diagnostic Panel. p Acceptable  
956 Alternative Primer and Probe Sets
- 957 80. A. Isaacs *et al.*, Combinatorial F-G Immunogens as Nipah and Respiratory Syncytial  
958 Virus Vaccine Candidates. *Viruses* **13** (2021).
- 959 81. J. ter Meulen *et al.*, Human monoclonal antibody combination against SARS  
960 coronavirus: synergy and coverage of escape mutants. *PLoS Med* **3**, e237 (2006).  
961
